# Supplementary material
Source: PubMed Central journal article supplement (PMC7489415)
Supplement: jamaophthalmol-e203190-s001.pdf [file jamaophthalmol-e203190-s001.pdf]

## Supplementary Online Content

Wolf RM, Channa R, Abramoff MD, Lehmann HP. Cost-effectiveness of autonomous point-of-care diabetic retinopathy screening for pediatric patients with diabetes. *JAMA Ophthalmol*. Published online September 3, 2020. doi:10.1001/jamaophthalmol.2020.3190

### **eAppendix.** Peds Automated DR Screening

This supplementary material has been provided by the authors to give readers additional information about their work.

|                                          |           |
|------------------------------------------|-----------|
| ECP out of pocket                        | 42        |
| DR Rx out of pocket                      | 43        |
| Prevalence                               | 44        |
| Sens Aut                                 | 45        |
| Spec Aut                                 | 46        |
| Sens ECP                                 | 47        |
| Spec ECP                                 | 48        |
| Relative Odds of Keeping ECP Appointment | 49        |
| 2-way analysis: sensECP and prev         | 50        |
| 2-way analysis: specAut and prev         | 51        |
| <b>Cost-Effectiveness</b>                | <b>52</b> |

## Summary

### Base Rates

Table 1

| Type 1        | Auto    | ECP    | Difference            | Incremental Cost-Effectiveness Ratio |
|---------------|---------|--------|-----------------------|--------------------------------------|
| Cost          | \$8.52  | \$7.91 | Δ Cost \$0.61         | \$31*                                |
| TP            | .026    | .006   | Δ Effectiveness 0.020 |                                      |
| <b>Type 2</b> |         |        |                       |                                      |
| Cost          | \$10.85 | \$8.20 | Δ Cost \$2.65         | \$95                                 |
| TP            | .038    | .010   | Δ Effectiveness 0.028 |                                      |

\*per extra DR detected by Autonomous, above ECP

### Sensitivity Analysis Summary

There is little uncertainty that alters the conclusion that Autonomous is more cost effective. ICER diagram is Figure 29.

Table 2

|                                           | Threshold | Base Case | Comment                                                                     |
|-------------------------------------------|-----------|-----------|-----------------------------------------------------------------------------|
| <b>Type 1/True Positives</b>              |           |           |                                                                             |
| Sens Autonomous                           | .19       | .87       | DNAC*                                                                       |
| Sens ECP                                  | None      | .35       | DNAC                                                                        |
| Probability of Going to ECP upon referral | .87       | .2        | DNAC                                                                        |
| Relative Odds of Keeping ECP Appointment  | 23        | 76        | DNAC                                                                        |
| <b>Type 1/Out of Pocket Costs</b>         |           |           |                                                                             |
| Autonomous out of pocket                  | None      | \$0       | ECP strategy always cheaper on average.                                     |
| ECP out of pocket                         | \$53      | \$35      | Autonomous is preferred if ECP out of pocket cost is higher, due to greater |

|                                          |      |      |                                                                                                     |
|------------------------------------------|------|------|-----------------------------------------------------------------------------------------------------|
|                                          |      |      | sensitivity (cECP threshold is higher as Aut sensitivity improves, and lower, as Aut spec improves) |
| DR Rx out of pocket                      | \$61 | \$94 | Autonomous cheaper at lower DR Rx cost                                                              |
| DR prevalence                            | .076 | .09  | If DR prevalence can be driven lower, Autonomous is preferred.                                      |
| Sensitivity Autonomous                   | .76  | .87  | If Aut sens drops below .76, Aut is cheaper                                                         |
| Specificity Autonomous                   | .93  | .91  | If Aut specificity were a little higher, it would be cheaper on average                             |
| Sensitivity of ECP                       | .23  | .35  | ECP loses its cost advantage if its sensitivity drops below .23                                     |
| Specificity ECP                          | .83  | .95  | ECP specificity is already above threshold, where it is cheaper on average                          |
| Diagnosability of Autonomous             | .98  | .96  | If Aut diagnosability is improved a bit more, Aut becomes cheaper on average.                       |
| Probability of keeping ECP Appointment   | .22  | .20  | Base value is just at threshold, above which Autonomous is preferred.                               |
| Relative Odds of Keeping ECP Appointment | 26   | 76   | DNAC                                                                                                |

|                          |                                                                                                                                            |
|--------------------------|--------------------------------------------------------------------------------------------------------------------------------------------|
| 2-way analyses           |                                                                                                                                            |
| cECP and sensAutonomous  | If Autonomous had lower sensitivity, ECP becomes cheaper, on average. "X" represents base case.                                            |
| sensAut and pECPscreened | As the sensitivity of Aut goes down, ECP becomes cheaper on average, especially if cECP goes down as well.                                 |
| cECP and specAut         | As the specificity of Aut goes up, the threshold on cECP goes down. But if specAut is less than .90 or so, ECP remains cheaper on average. |

|                               |                                                                                                                                                                                                                                |
|-------------------------------|--------------------------------------------------------------------------------------------------------------------------------------------------------------------------------------------------------------------------------|
| DR prevalence vs pECPScreened | As the prevalence of DR goes up, the threshold for families keeping their ECP appointment at which Autonomous becomes cheaper on average also goes up. See ICER graph (Figure 29).                                             |
| DR Prevalence vs cost of ECP  | As the prevalence of DR prevalence rises, the threshold for cECP at which Autonomous becomes cheaper on average goes up as well, until a prevalence of about .13, at which point ECP remains cheaper on average for all cECPs. |

| <b>Type 2/True Positives</b>              |      |      |      |
|-------------------------------------------|------|------|------|
| DR Prevalence                             | None | .137 | DNAC |
| Sens Autonomous                           | None | .87  | DNAC |
| Probability of Going to ECP upon referral | .87  | .20  | DNAC |
| Relative Odds of Keeping ECP Appointment  | 23   | 76   | DNAC |
| <b>Type 2/Out of pocket costs</b>         |      |      |      |
| Autonomous out of pocket                  | None | \$0  | DNAC |
| ECP out of pocket                         | None | \$35 | DNAC |
| DR Treatment                              | \$0  | \$94 | DNAC |
| DR prevalence                             | None | .137 | DNAC |
| Sensitivity Aut                           | .54  | .87  | DNAC |
| Spec Aut                                  | None | .91  | DNAC |
| Sens ECP                                  | .001 | .35  | DNAC |
| Spec ECP                                  | .42  | .95  | DNAC |
| Relative Odds of Keeping ECP Appointment  | 23   | 76   | DNAC |

| <b>2-way analyses</b> |                                                     |
|-----------------------|-----------------------------------------------------|
| sensECP and prev      | The higher the prevalence, the lower the threshold  |
| specAut and prev      | the higher the prevalence, the higher the threshold |

\*DNAC= Does not affect conclusion

## The Tree

Figure 1

Graphic of tree in calculation:

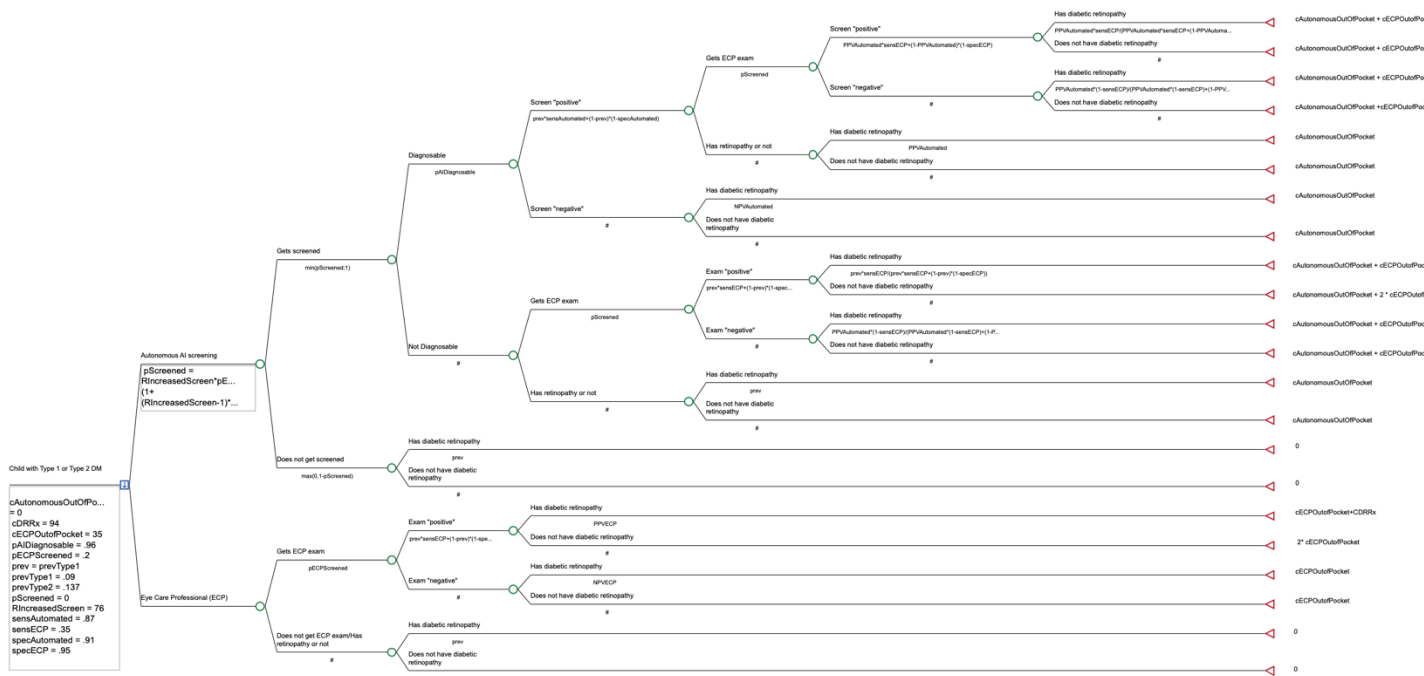

Figure 2

## The Variables

Cost of missed retinopathy: (going blind)

| Name                             | Description                                                                     | Definition | Low   |
|----------------------------------|---------------------------------------------------------------------------------|------------|-------|
| <b>cAutomatedOutOfPocket</b>     | Out of pocket cost for the automated screen                                     | 0          | 0     |
| <b>cECPOutOfPocket</b>           | Out of pocket cost for the ophtho visit                                         | 35         | 0     |
| <b>cDRRx</b>                     | Out of pocket cost for treating retinopathy                                     | 94         | 0     |
| <b>pECPScreened</b>              | Probability of a patient going for expert-based screening                       | .20        | 0.15  |
| <b>pPositiveAutonomousScreen</b> | Probability that a positively-screened patient will followup with Ophthalmology | .95        | 0     |
| <b>pAIDiagnosable</b>            | Probability that image can be obtained and classified                           | .96        | .8    |
| <b>prev</b>                      | Prevalence of retinopathy in the population                                     | .09        | 0.056 |
| <b>RIncreasedScreen</b>          | Relative odds of getting screened, with respect to                              | 76         | 0.5   |
| <b>sensAutomated</b>             | Sensitivity of the automated screen                                             | .87        | 0.001 |
| <b>sensECP</b>                   | Sensitivity of the Expert exam                                                  | .35        | 0.001 |
| <b>specAutomated</b>             | Specificity of the automated screen                                             | .91        | 0.001 |
| <b>specECP</b>                   | Specificity of the Expert screen                                                | .9         | 0.001 |



For legibility:

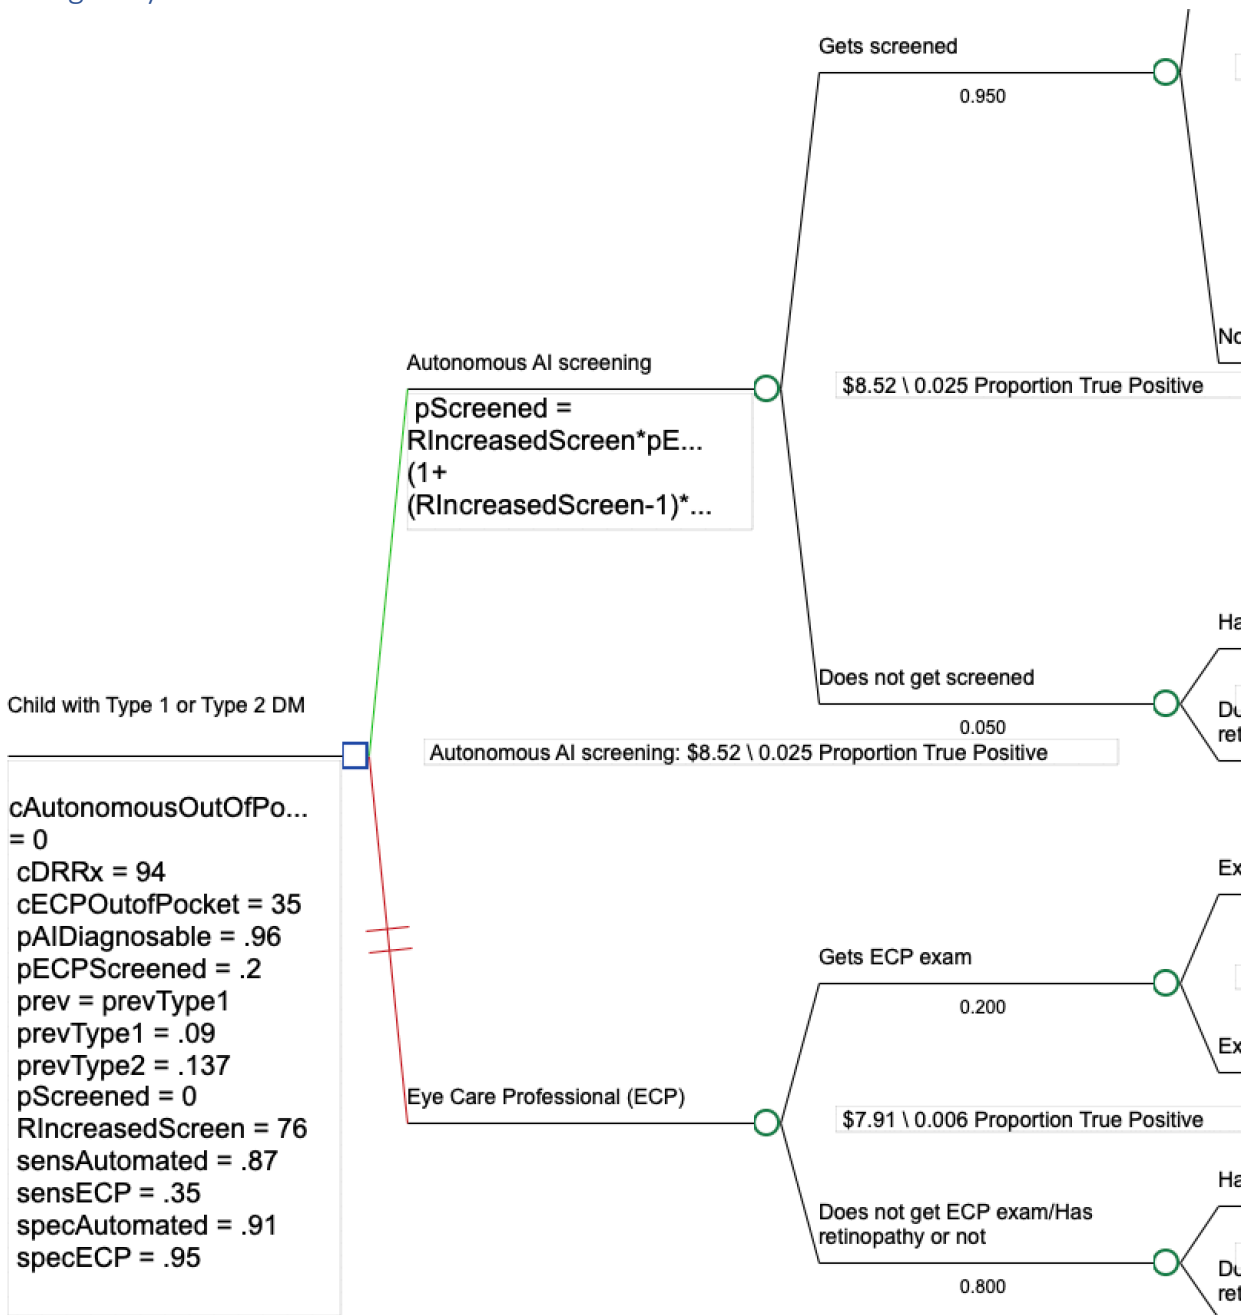

Figure 4

Base Case Results, Type 1 and Type 2

6/15/20

[PedsRetinaScreening.JAMA.15June2020.trex](https://pubs.rsos.royalsocietypublishing.org/doi/10.1098/rsos.200111)

cDRRx      Payoff 3      Payoff 7      Payoff 3      Payoff 7      Payoff 3      Payoff 7      Payoff 3      Payoff 7

| Raw    | Type 1     |       |       |       |       | Type 2     |       |       |  |  |
|--------|------------|-------|-------|-------|-------|------------|-------|-------|--|--|
|        | Autonomous |       | ECP   |       |       | Autonomous |       | ECP   |  |  |
|        | DR         | No DR | DR    | No DR | DR    | No DR      | DR    | No DR |  |  |
| Exam + | 0.026      | 0.011 | 0.006 | 0.009 | 0.038 | 0.01       | 0.01  | 0.009 |  |  |
| Exam - | 0.064      | 0.899 | 0.084 | 0.901 | 0.099 | 0.853      | 0.127 | 0.854 |  |  |
|        | 0.09       | 0.91  | 0.09  | 0.91  | 0.137 | 0.863      | 0.137 | 0.863 |  |  |

| Rates  | Type 1     |       |       |       |       | Type 2     |       |       |  |  |
|--------|------------|-------|-------|-------|-------|------------|-------|-------|--|--|
|        | Autonomous |       | ECP   |       |       | Autonomous |       | ECP   |  |  |
|        | DR         | No DR | DR    | No DR | DR    | No DR      | DR    | No DR |  |  |
| Exam + | 0.289      | 0.012 | 0.067 | 0.010 | 0.277 | 0.012      | 0.073 | 0.010 |  |  |
| Exam - | 0.711      | 0.988 | 0.933 | 0.990 | 0.723 | 0.988      | 0.927 | 0.990 |  |  |
|        | 1          | 1     | 1     | 1     | 1     | 1          | 1     | 1     |  |  |

LR+                      23.9                                      6.7                                      23.9                                      7.0  
 LR-                      1.4                                              1.1                                              1.4                                              1.1

Payoff 5

Cost

|     |        |
|-----|--------|
| Raw | Type I |
|-----|--------|

|         |
|---------|
| Type II |
|---------|



|       | Autonomous | ECP  |  |
|-------|------------|------|--|
| Total | 8.52       | 7.91 |  |

| Autonomous | ECP |
|------------|-----|
| 10.85      | 8.2 |

CEA

| TP | Type 1                 | ICER Ratio |
|----|------------------------|------------|
|    | $\Delta$ Cost          | 0.61       |
|    | $\Delta$ Effectiveness | 0.02       |
|    |                        | \$31       |

| Type 2                 |       |    |
|------------------------|-------|----|
| $\Delta$ Cost          | 2.65  | 95 |
| $\Delta$ Effectiveness | 0.028 |    |

## Sensitivity Analysis Type 1 DM: True Positives

Here, expected value reflects true positives detected, so *higher* expected values are preferred.

### Tornado Diagram

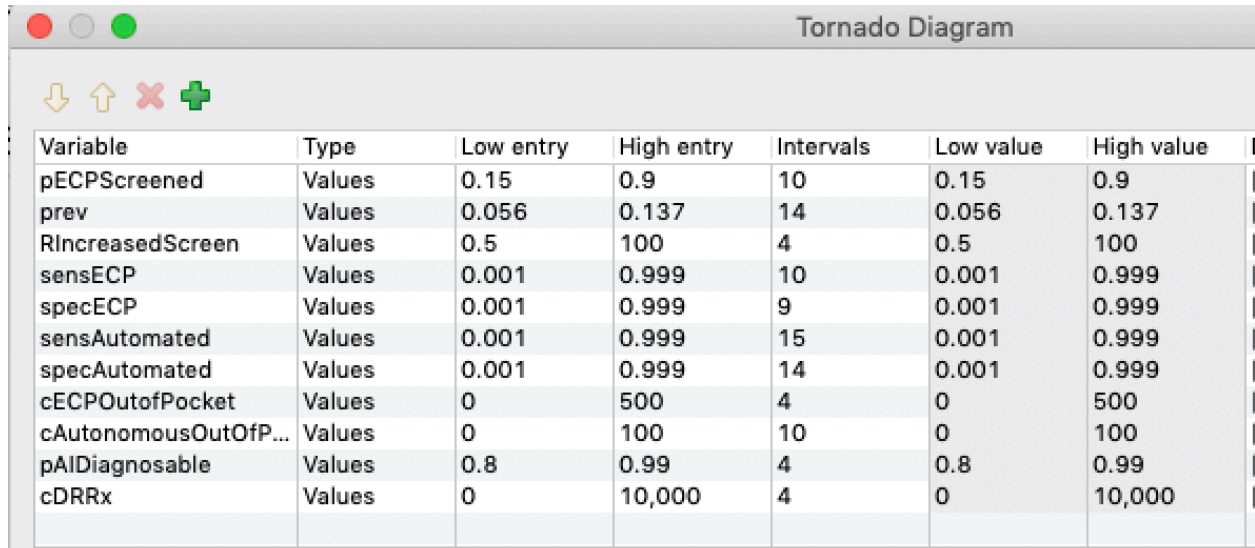

The screenshot shows a window titled "Tornado Diagram" with a toolbar containing icons for a downward arrow, an upward arrow, a red X, and a green plus sign. Below the toolbar is a table with the following data:

| Variable             | Type   | Low entry | High entry | Intervals | Low value | High value |
|----------------------|--------|-----------|------------|-----------|-----------|------------|
| pECPScreened         | Values | 0.15      | 0.9        | 10        | 0.15      | 0.9        |
| prev                 | Values | 0.056     | 0.137      | 14        | 0.056     | 0.137      |
| RIncreasedScreen     | Values | 0.5       | 100        | 4         | 0.5       | 100        |
| sensECP              | Values | 0.001     | 0.999      | 10        | 0.001     | 0.999      |
| specECP              | Values | 0.001     | 0.999      | 9         | 0.001     | 0.999      |
| sensAutomated        | Values | 0.001     | 0.999      | 15        | 0.001     | 0.999      |
| specAutomated        | Values | 0.001     | 0.999      | 14        | 0.001     | 0.999      |
| cECPOutofPocket      | Values | 0         | 500        | 4         | 0         | 500        |
| cAutonomousOutOfP... | Values | 0         | 100        | 10        | 0         | 100        |
| pAIDiagnosable       | Values | 0.8       | 0.99       | 4         | 0.8       | 0.99       |
| cDRRx                | Values | 0         | 10,000     | 4         | 0         | 10,000     |

Figure 5

## Tornado Diagram

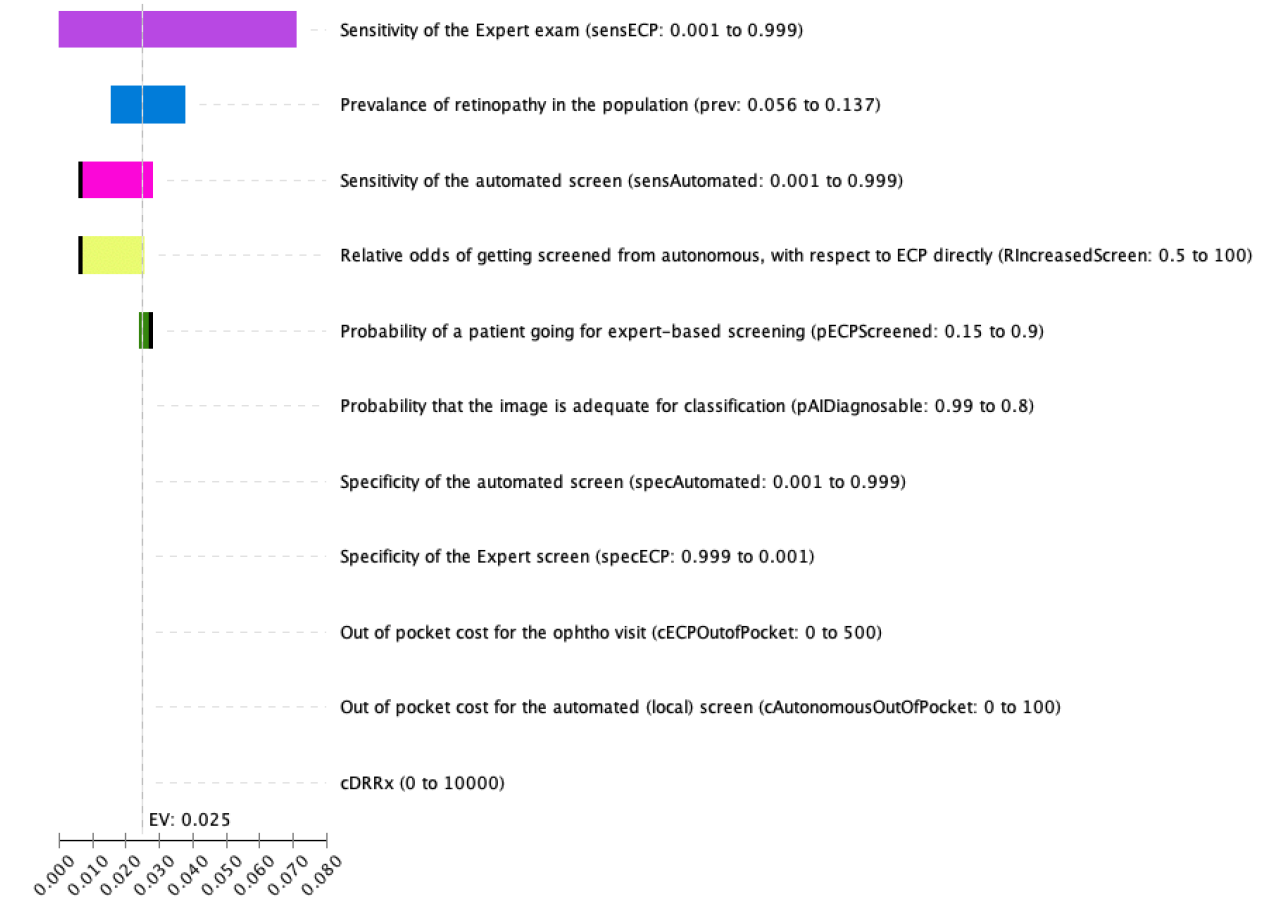

Figure 6

## Prevalence

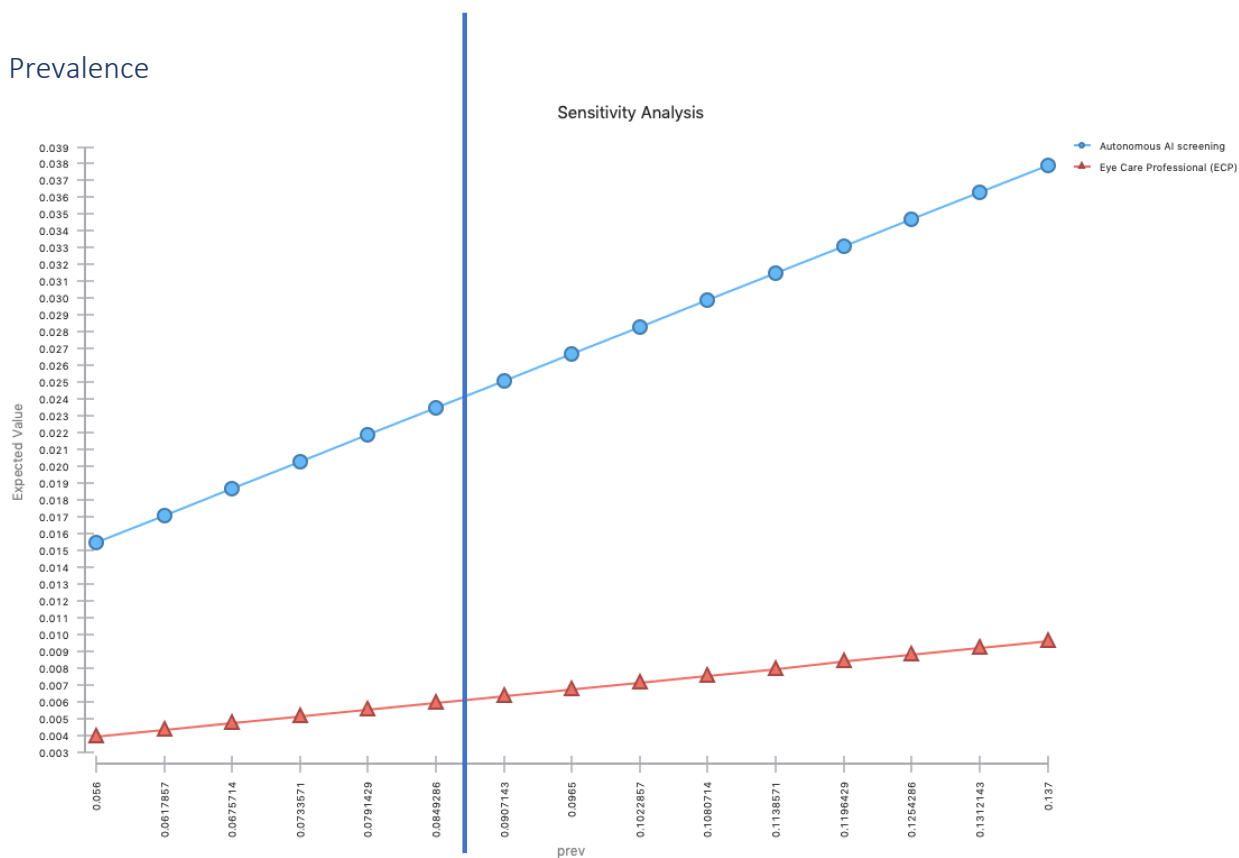

Figure 7

There is no threshold for prevalence; Autonomous always identifies more TPs.

## Sensitivity of Autonomous

The vertical blue line, here and later, identifies the base case value (on the x-axis).

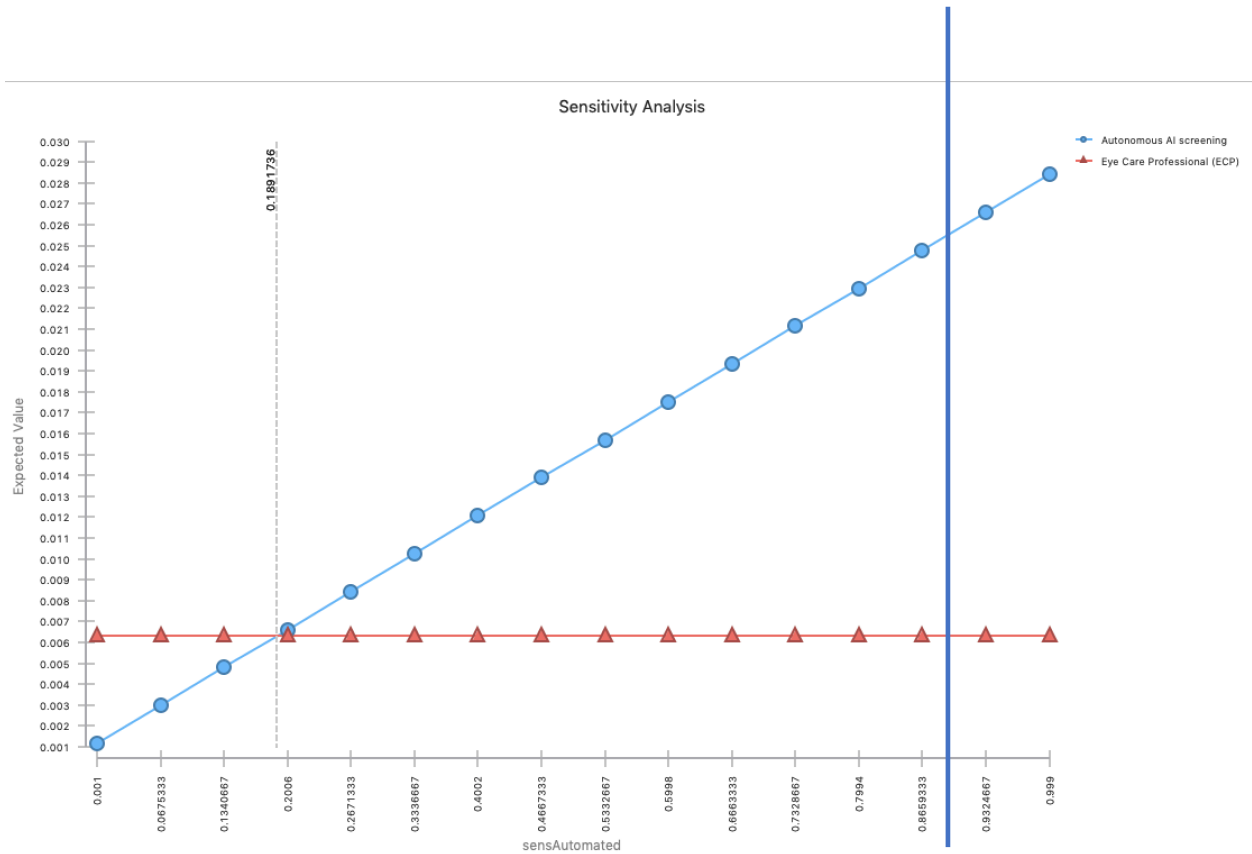

**Figure 8**  
Autonomous detects more cases of DR above a sensitivity of .19, significantly below the base-case sensitivity of .87. Higher sensitivity means that more tests are positive. The number of TPs identified in the ECP-only strategy is unaffected by the sensitivity of the AI-based test.

Sensitivity of the ECP

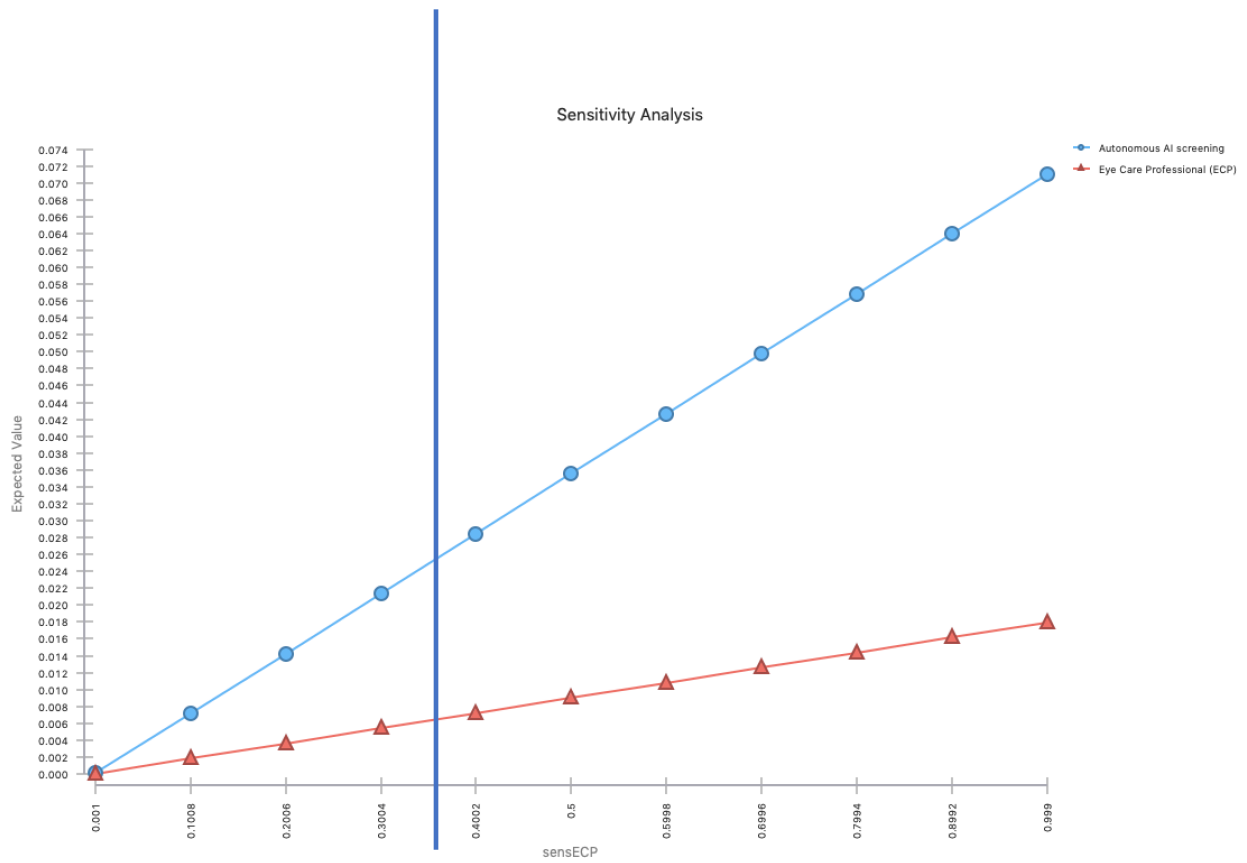

Figure 9

There is no threshold in TP due to sensitivity of the ECP: Because the detection by Autonomous is built on detection by ECP, detection of Autonomous always goes up as the sensitivity of the ECP goes up.

Probability of Going to ECP upon referral

© 2020 American Medical Association. All rights reserved.

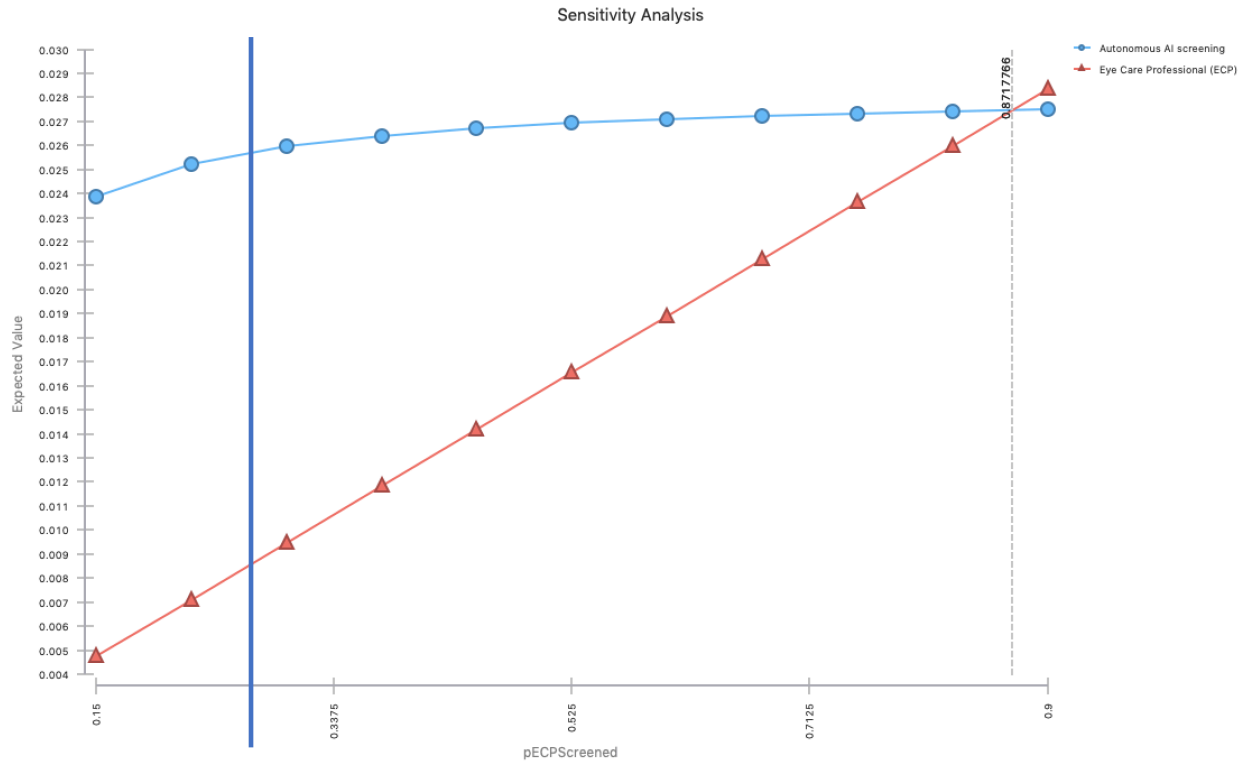

Figure 10

The ECP strategy detects more TPs only if the keeping-appointment probability is above 87%, well above the base rate of 20%. The detection rate by Autonomous does not change much, with an ECP keeping-appointment rate above .2, because the relative odds of Autonomous-positive patients is already so high.

### Relative Odds of Keeping ECP Appointment

© 2020 American Medical Association. All rights reserved.

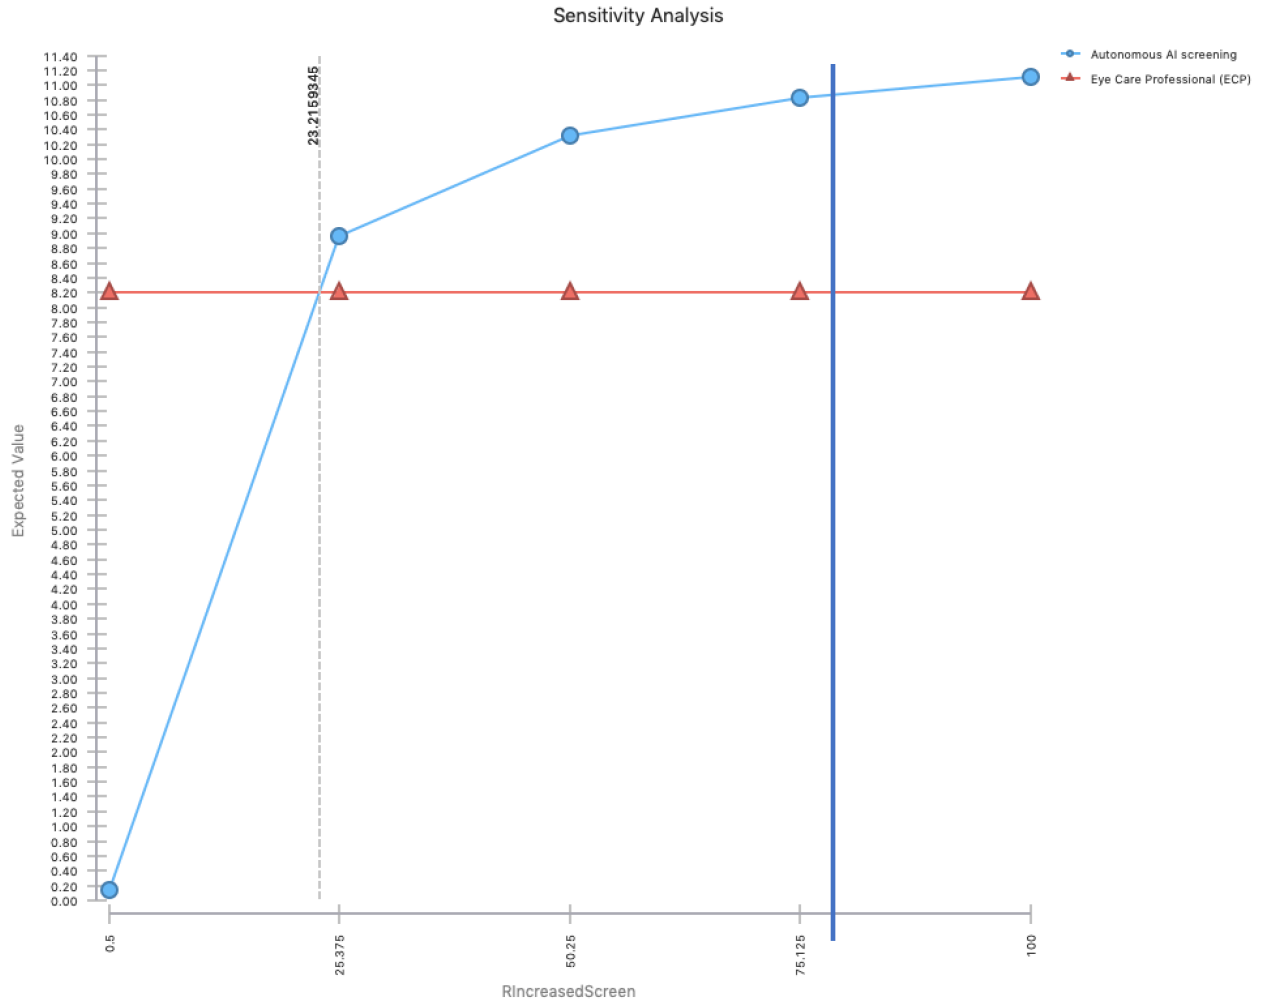

Figure 11  
 Still the same behavior as before. The threshold here is at a Relative odds of 26 (or probability, based on pECP of .20, of .88), a bit lower than in type 1.

### Sensitivity Analysis: Type 1 DM: Out of pocket costs

Here, Expected value is expected (average) cost to the patient family, so *lower* expected values are *preferred*.



## Tornado Diagram

| Variable             | Type   | Low entry | High entry | Intervals | Low value | High value |
|----------------------|--------|-----------|------------|-----------|-----------|------------|
| pECPScreened         | Values | 0.15      | 0.9        | 10        | 0.15      | 0.9        |
| prev                 | Values | 0.056     | 0.137      | 14        | 0.056     | 0.137      |
| RIncreasedScreen     | Values | 0.5       | 100        | 4         | 0.5       | 100        |
| sensECP              | Values | 0.001     | 0.999      | 10        | 0.001     | 0.999      |
| specECP              | Values | 0.001     | 0.999      | 9         | 0.001     | 0.999      |
| sensAutomated        | Values | 0.001     | 0.999      | 15        | 0.001     | 0.999      |
| specAutomated        | Values | 0.001     | 0.999      | 14        | 0.001     | 0.999      |
| cECPOutofPocket      | Values | 0         | 500        | 4         | 0         | 500        |
| cAutonomousOutOfP... | Values | 0         | 100        | 10        | 0         | 100        |
| pAIDiagnosable       | Values | 0.8       | 0.99       | 4         | 0.8       | 0.99       |
| cDRRx                | Values | 0         | 10,000     | 4         | 0         | 10,000     |

Figure 12

## Tornado Diagram

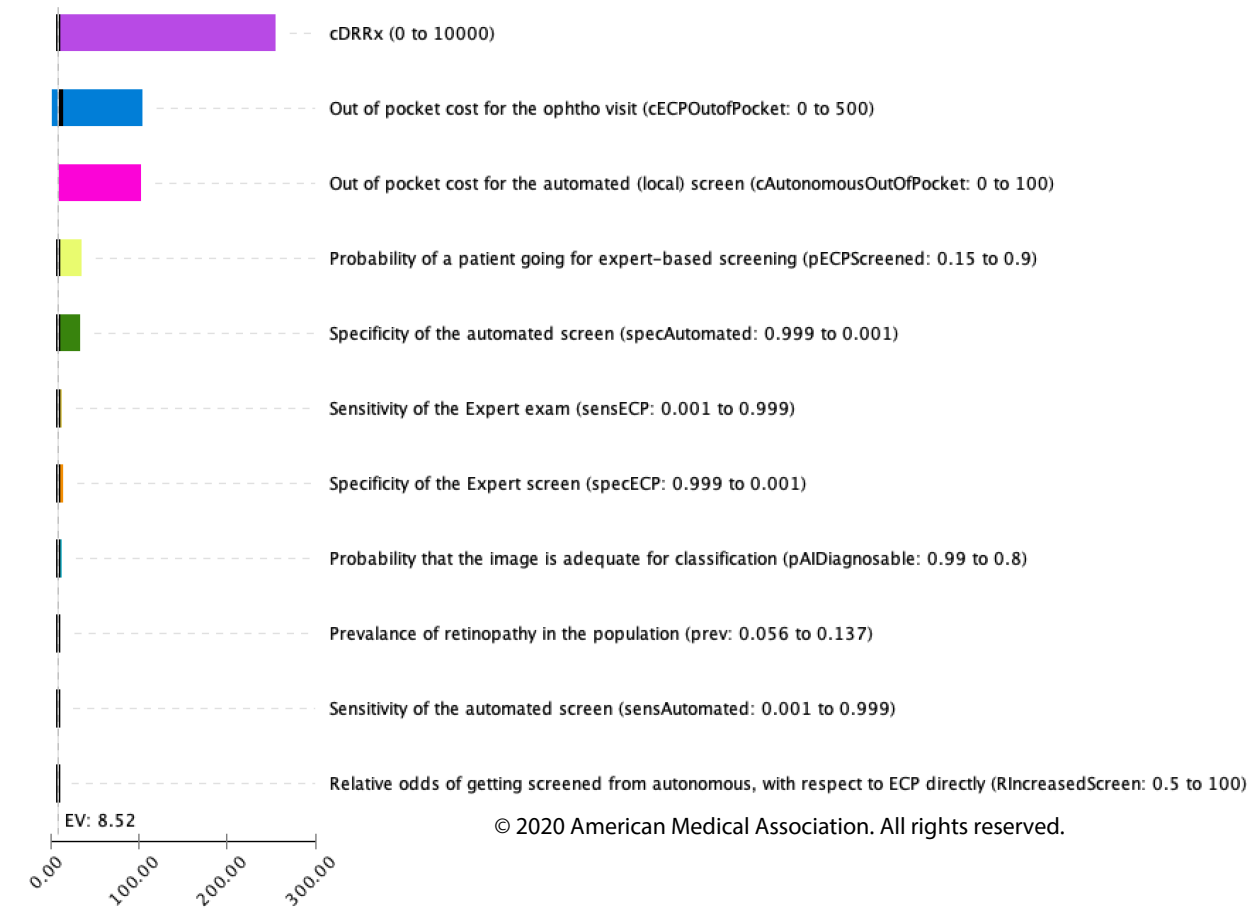

Figure 13

Sensitivity Analyses: Type 1 DM/Out of pocket  
Costs Autonomous out of pocket cost

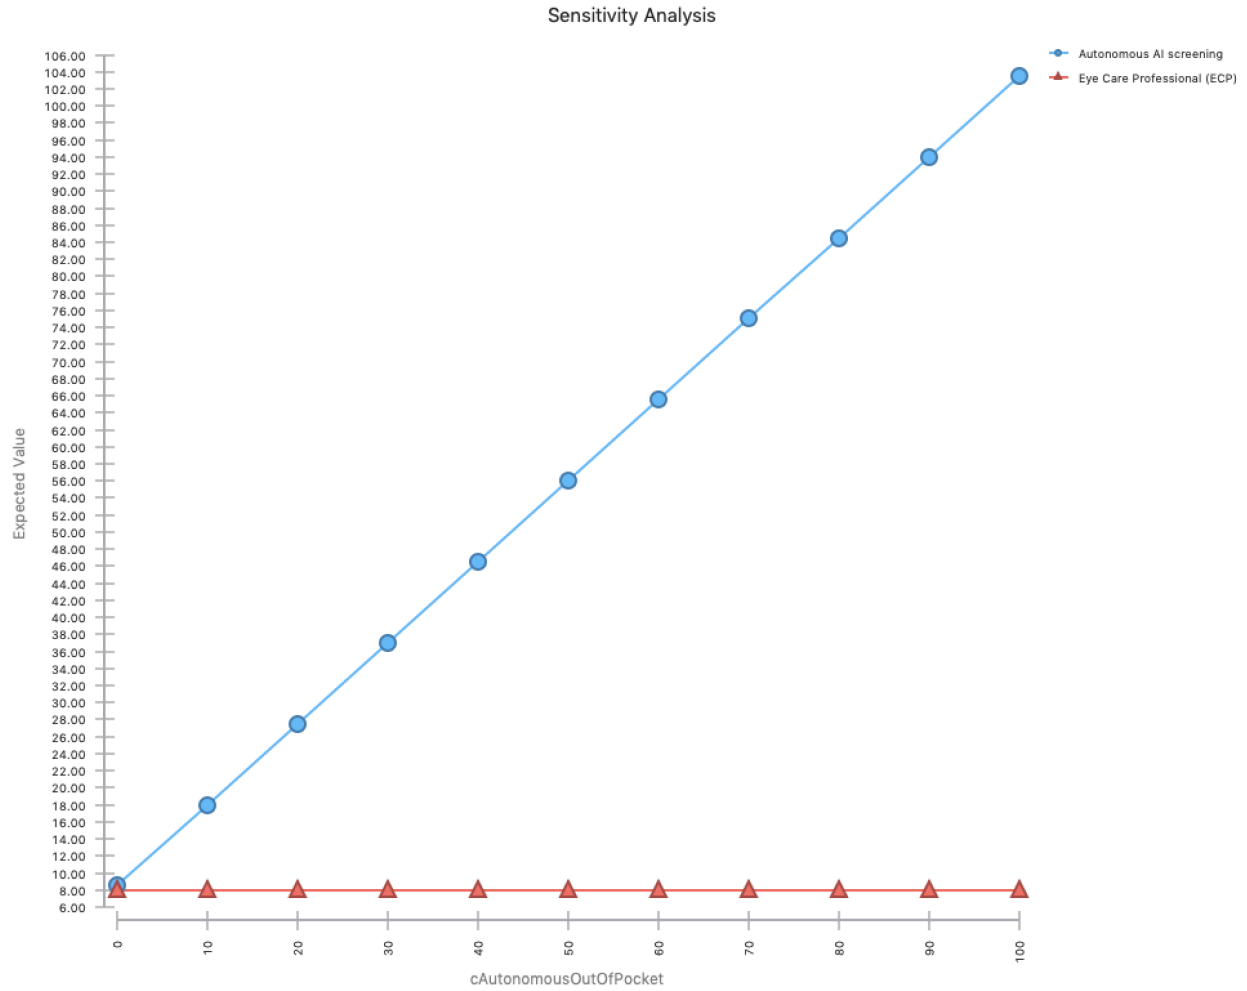

Figure 14  
ECP strategy is unaffected by cAutonomous, and remains cheaper.

ECP visit out of pocket cost

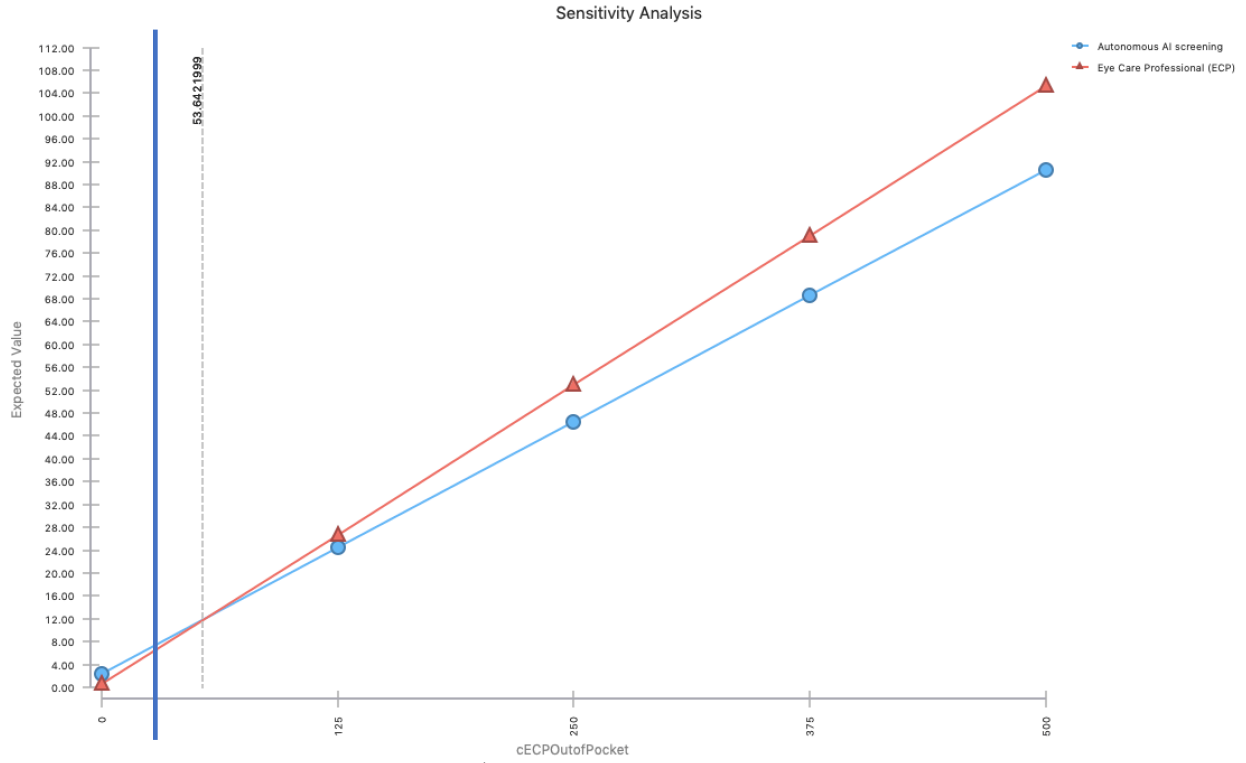

Above an ECP-out-of-pocket cost of \$53, Autonomous becomes cheaper, probably because of better sensitivity. See the corresponding 2-way sensitivity analysis, below.

DR Treatment out of pocket cost

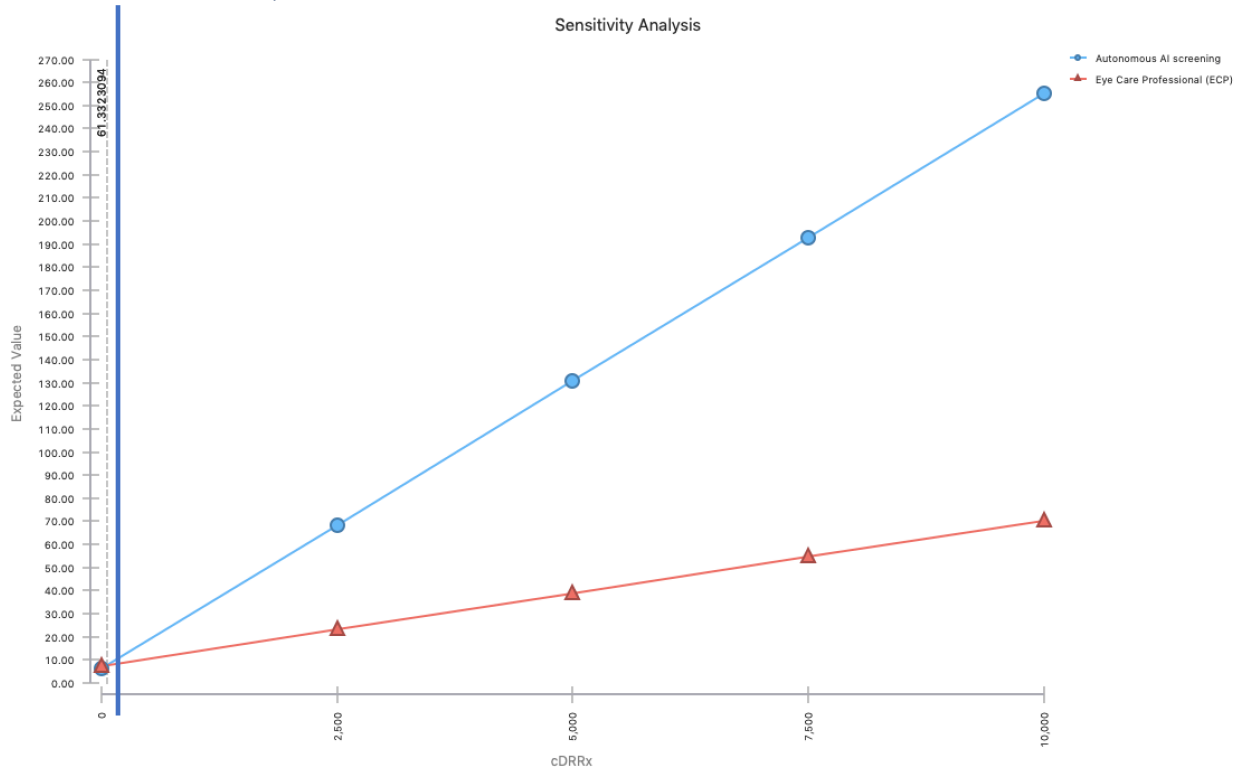

Figure 15

© 2020 American Medical Association. All rights reserved.

If the out-of-pocket cost to the patient of DR Rx is under \$61 (below the base-case rate of \$94), then Autonomous ends up being cheaper to the patient, on average. Even at an out-of-pocket cost of \$10,000, the *average* cost to the patient is only \$260. (However, patients are risk averse to paying \$10,000 for treatment.)

### DR prevalence in Type 1 DM

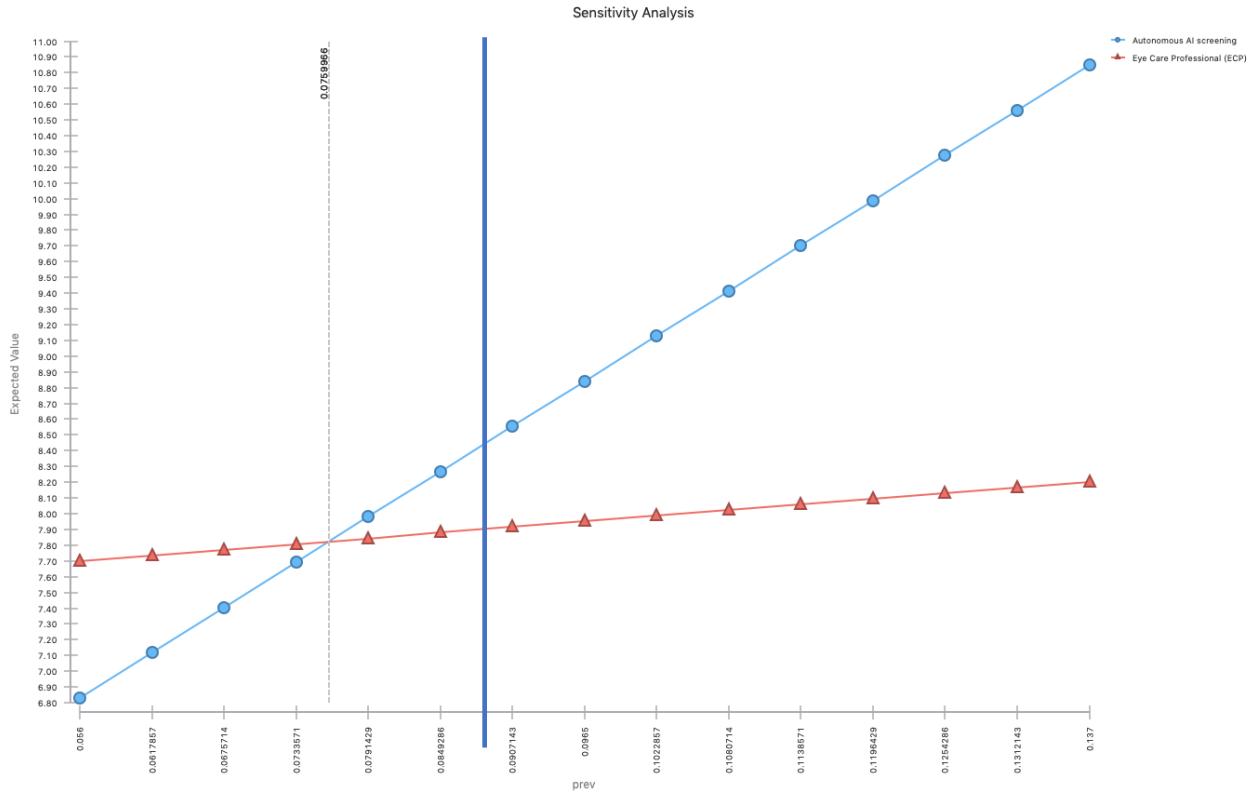

Figure 16

If the prevalence of DR in children with Type 1 DM were below .076, Autonomous is cheaper on average. The base case value is .09, significantly higher. If DR prevalence can be driven lower, Autonomous is preferred.

### Sensitivity Autonomous

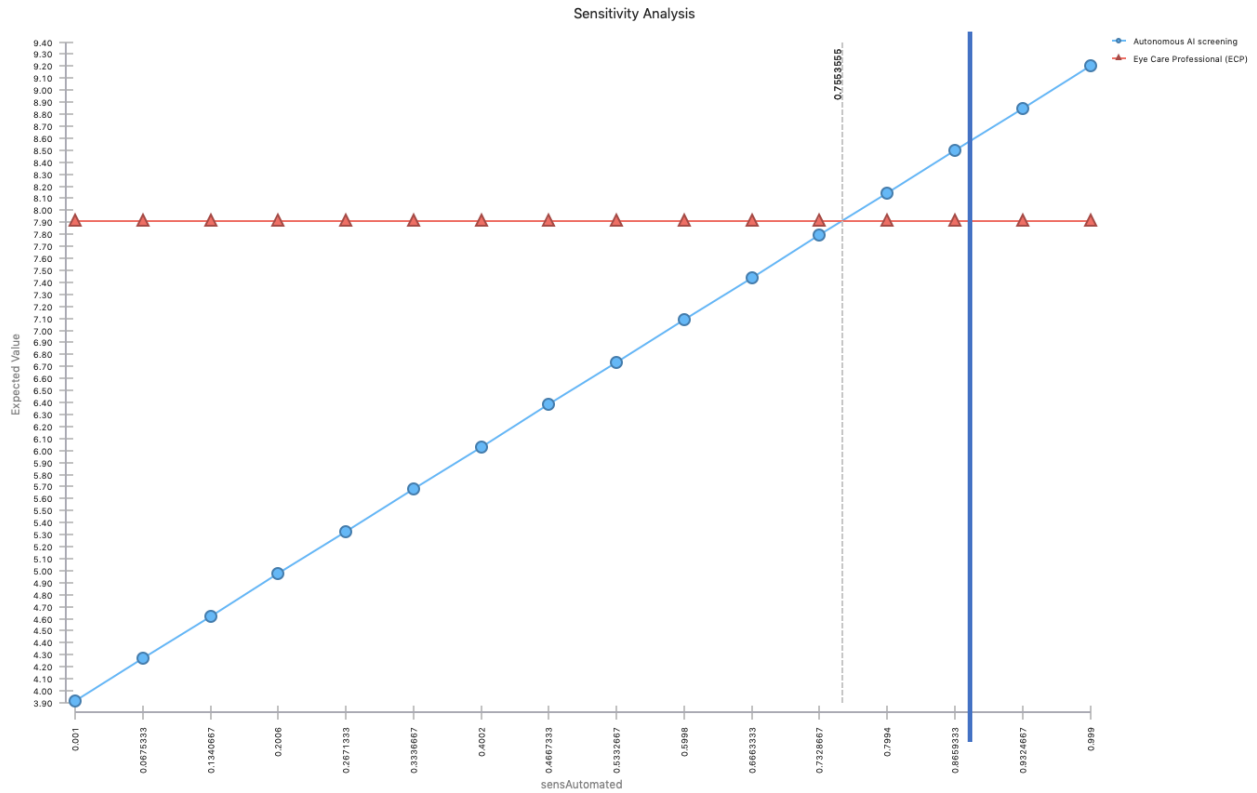

Figure 17

If the sensitivity of Autonomous were below .76 (rather than the base case value of .87), ECP would be cheaper on average, presumably because the low ECP referral rate leads to a comparable detection rate; see 2-way analysis (cECP vs sensAut). The 1-way analysis confirms thae thought behind the conclusion re cECP.

# Specificity Autonomous

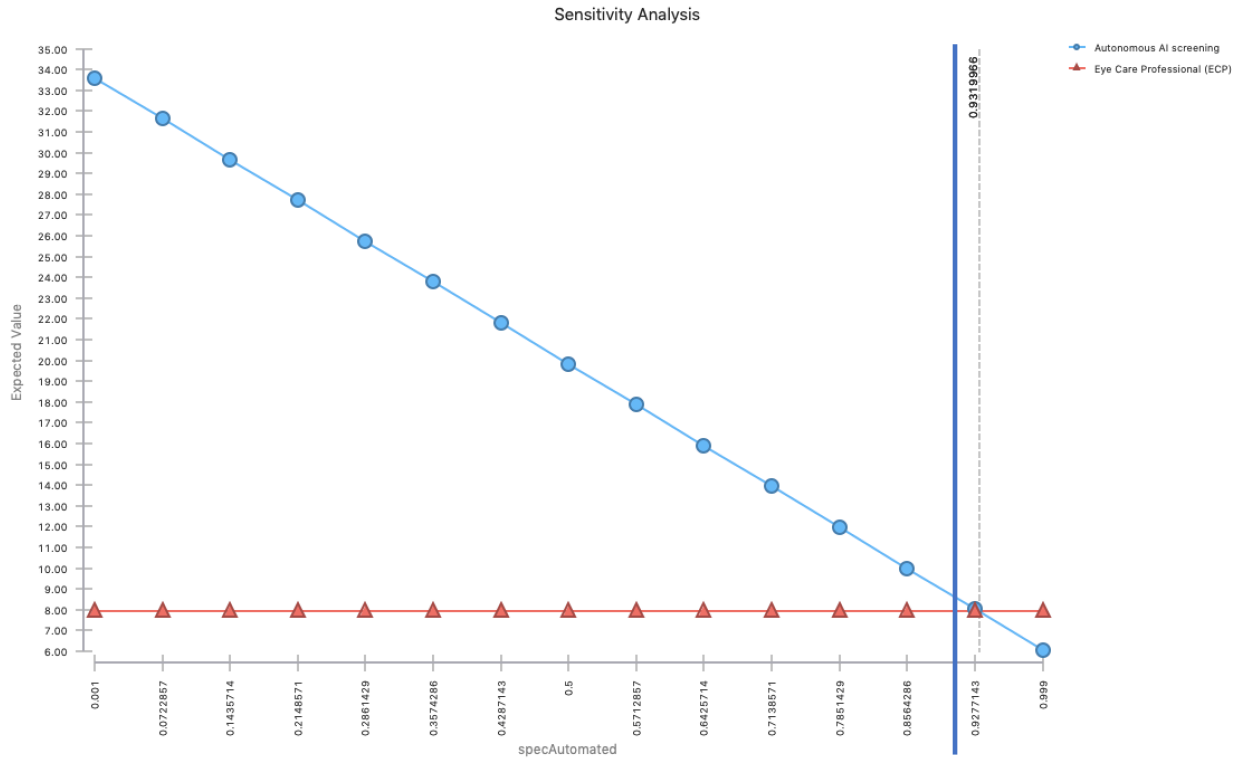

Figure 18

If the specificity of Autonomous were higher than .93 (base case is .91), Autonomous would have a lower average out-of-pocket cost (presumably because of the lower false-positive rate and lower referrals to ECP). If Aut specificity were a little higher, it would be cheaper on average.

# Sensitivity of ECP

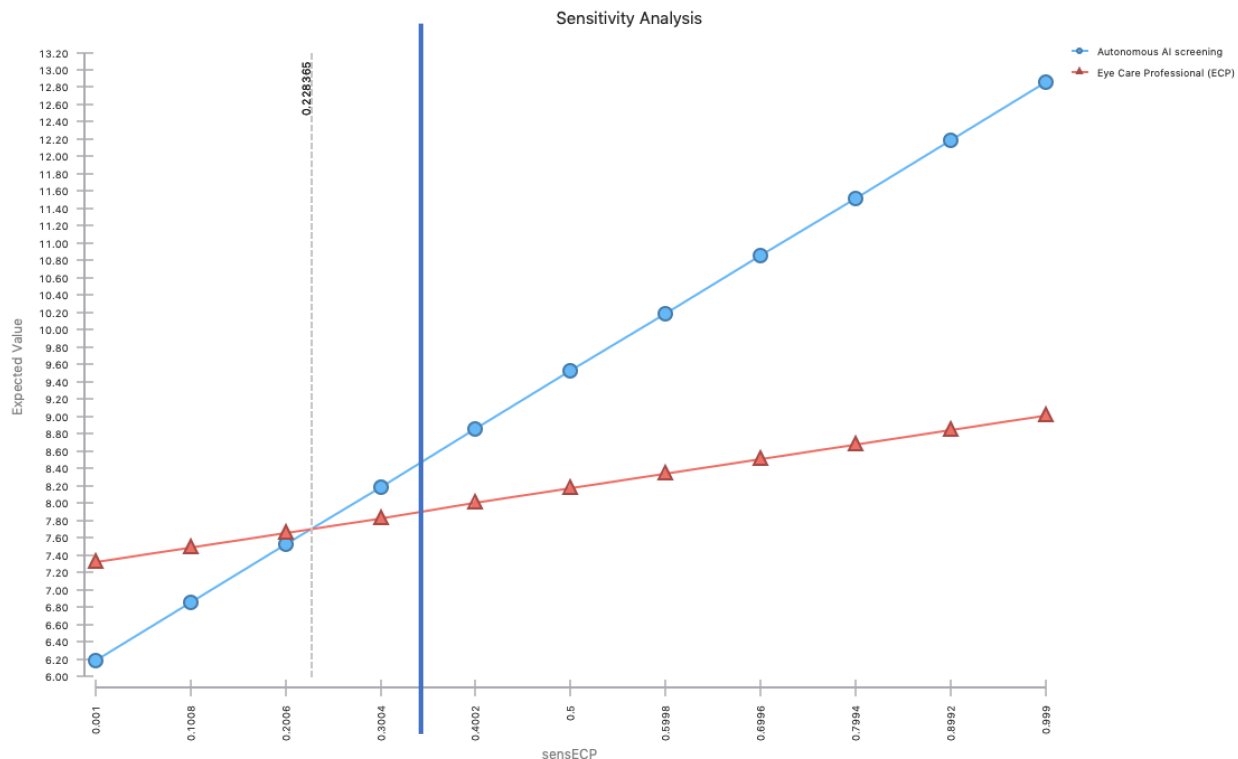

Figure 19

The threshold (going to the left) that would make Autonomous cheaper on average than ECP is an ECP sensitivity of .23, below the current .35. ECP loses its cost advantage if its sensitivity drops below .23

# Specificity ECP

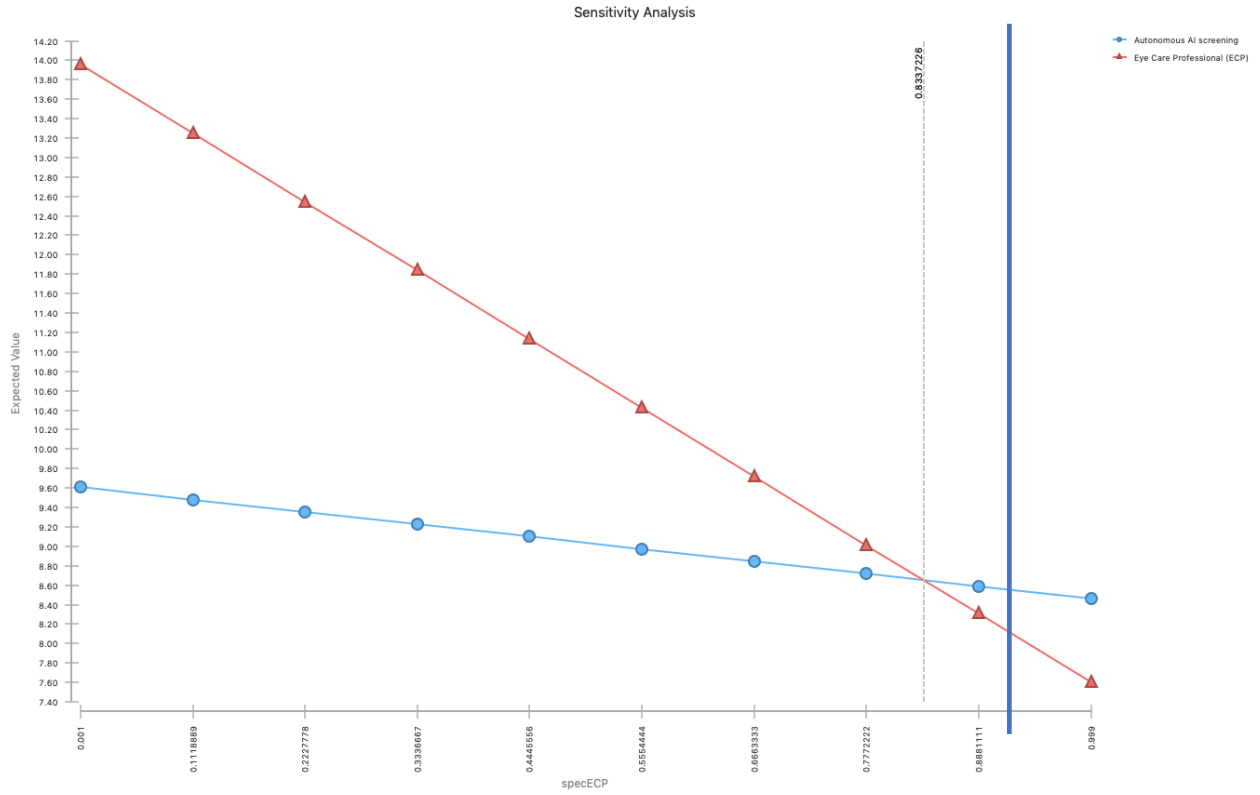

Figure 20

The base-case specificity of .95 is already above the threshold value of .83, where ECP becomes cheaper than Autonomous, on average.



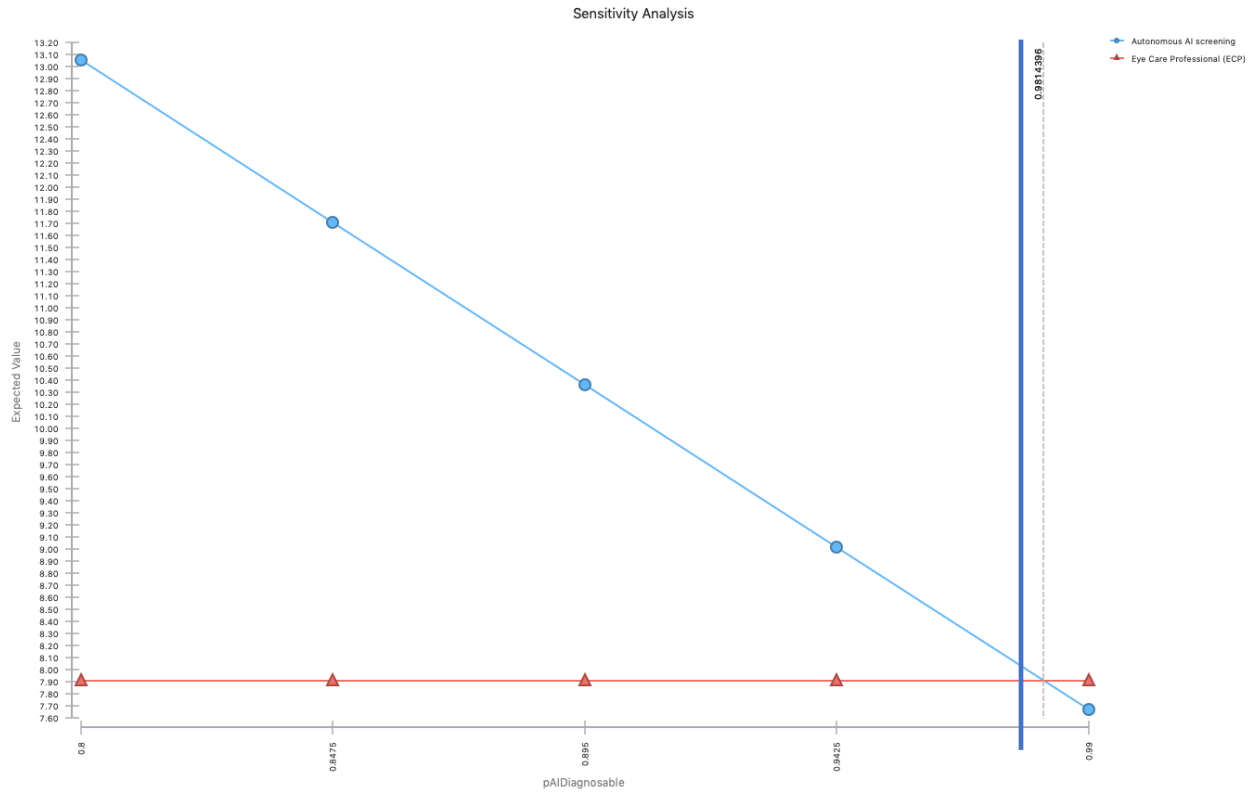

*Figure 21*  
 The base case value of .96 is just below the threshold value of .98, where Autonomous becomes cheaper, on average. If diagnosability is improved a bit more, Aut becomes cheaper on average.

Probability of keeping ECP Appoinement

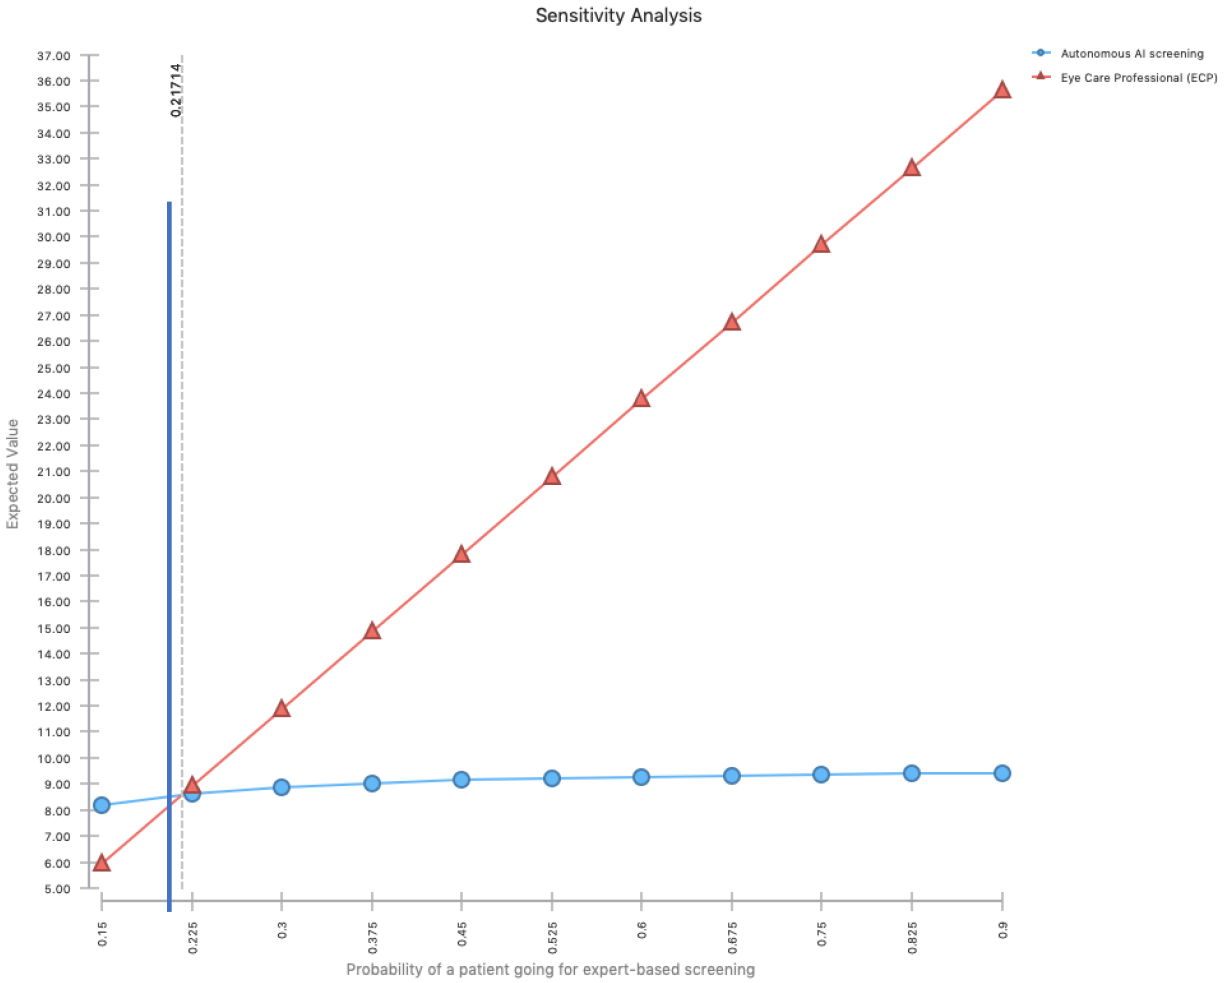

Figure 22

Autonomous becomes cheaper on average if pECPscreened improves from .20 to .22, as more patients go to ECP and incur that cost. Base value is just at threshold, above which Autonomous is preferred.

© 2020 American Medical Association. All rights reserved.

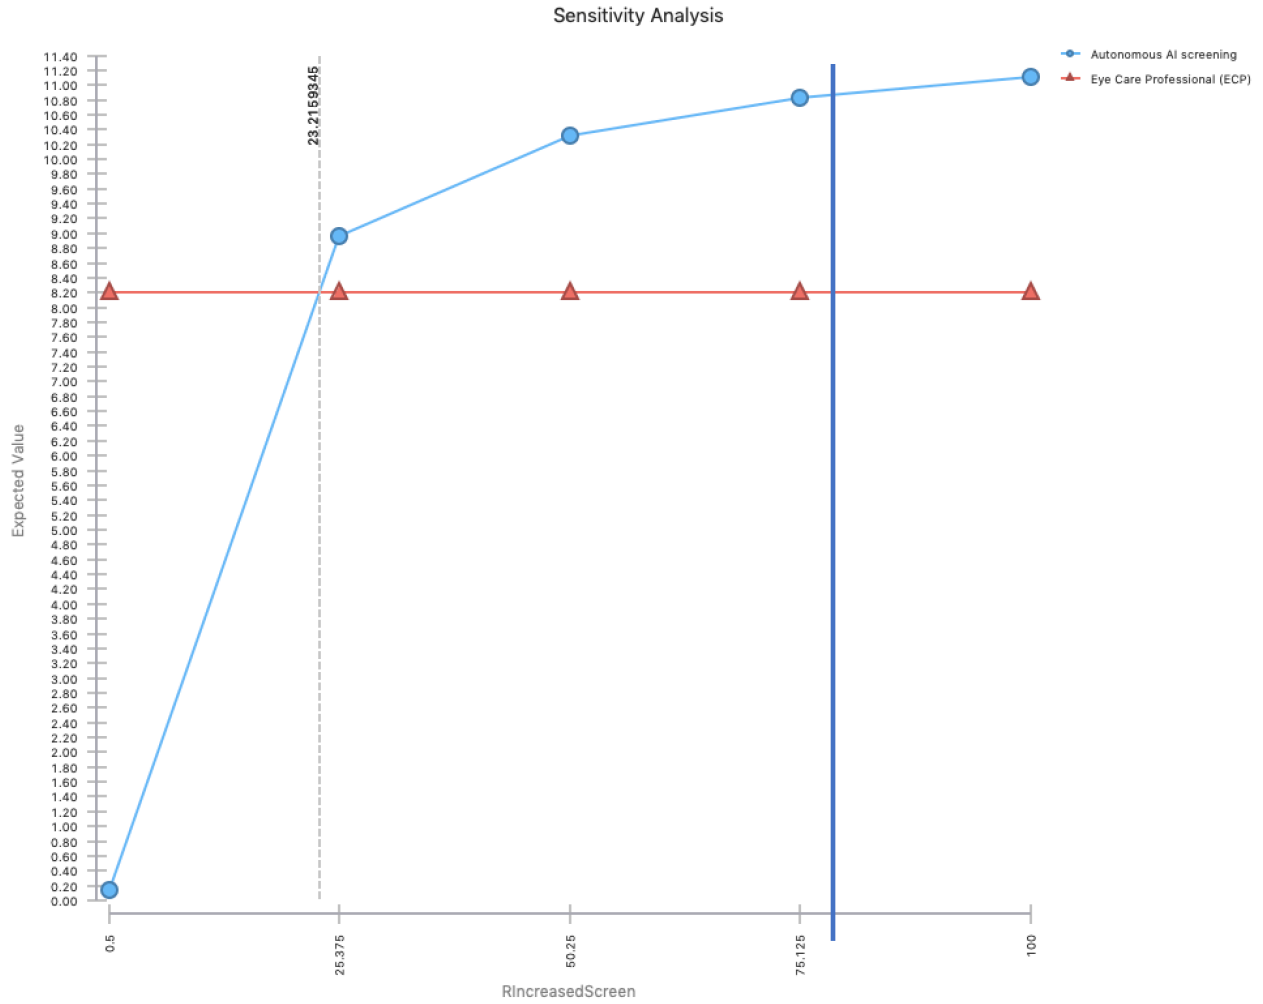

Figure 23  
 Still the same behavior as before. The threshold here is at a Relative odds of 26 (or probability, based on pECP of .20, of .88), a bit lower than in type 1.

© 2020 American Medical Association. All rights reserved.

2-way analysis: cECP and sensAutonomous

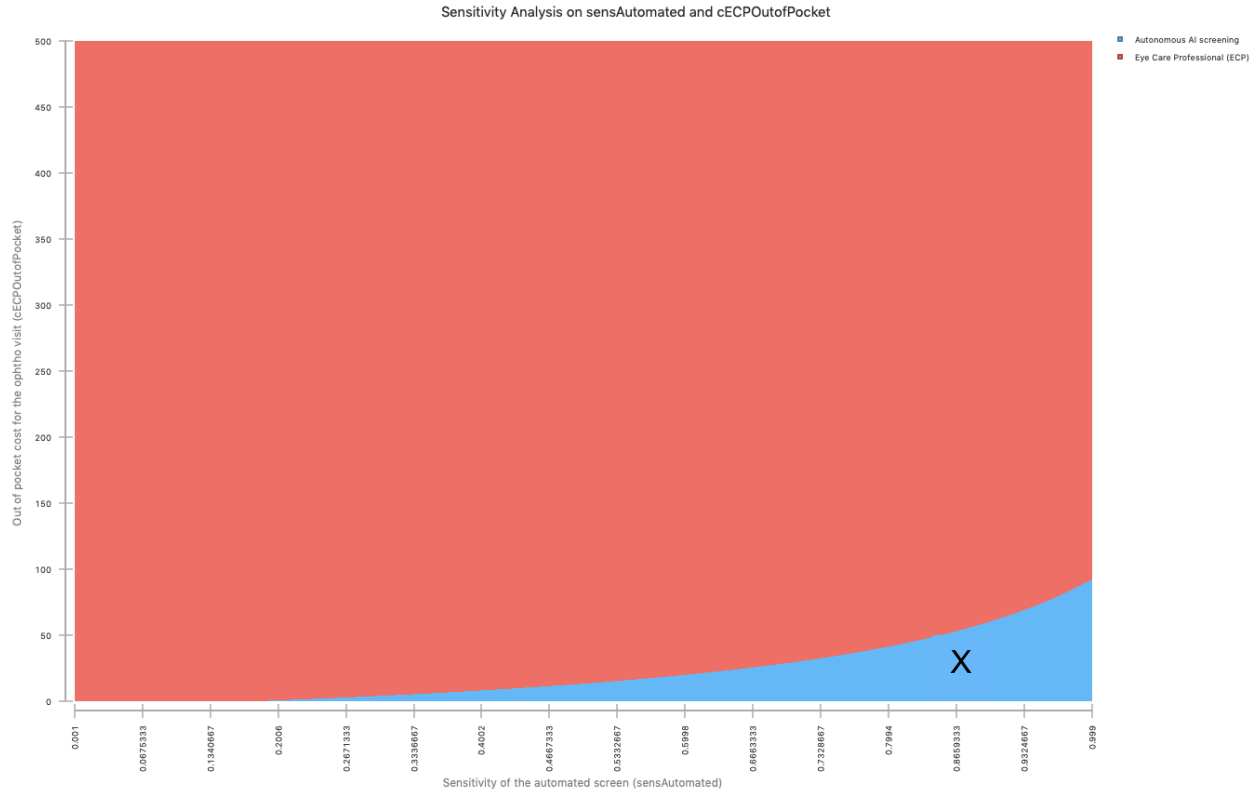

**Figure 24**  
 This analysis confirms the thought re cECP, above, that if Autonomous had lower sensitivity, ECP becomes cheaper, on average. “X” represents base case.

© 2020 American Medical Association. All rights reserved.

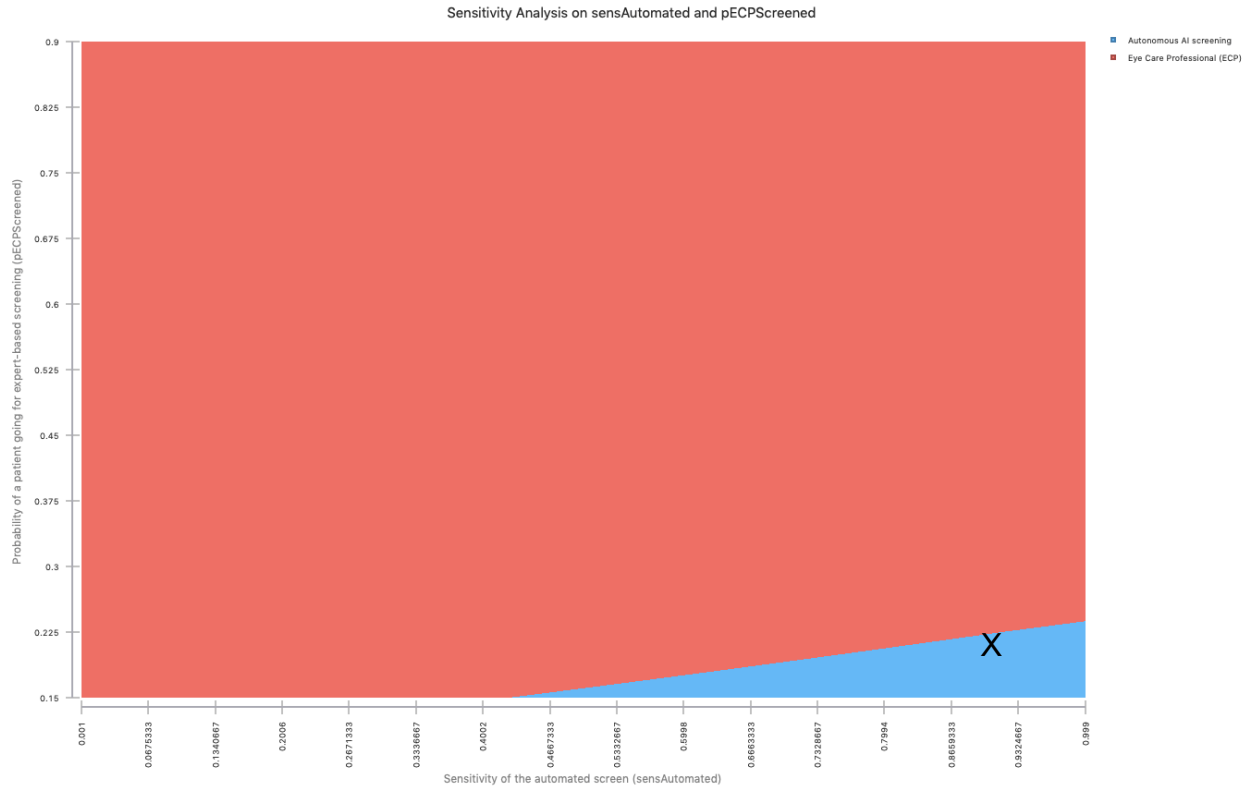

Figure 25

As suggested above, as the sensitivity of Aut goes down, ECP becomes cheaper on average, especially if cECP goes down as well.

© 2020 American Medical Association. All rights reserved.

2-way analysis: cECP and spec Aut

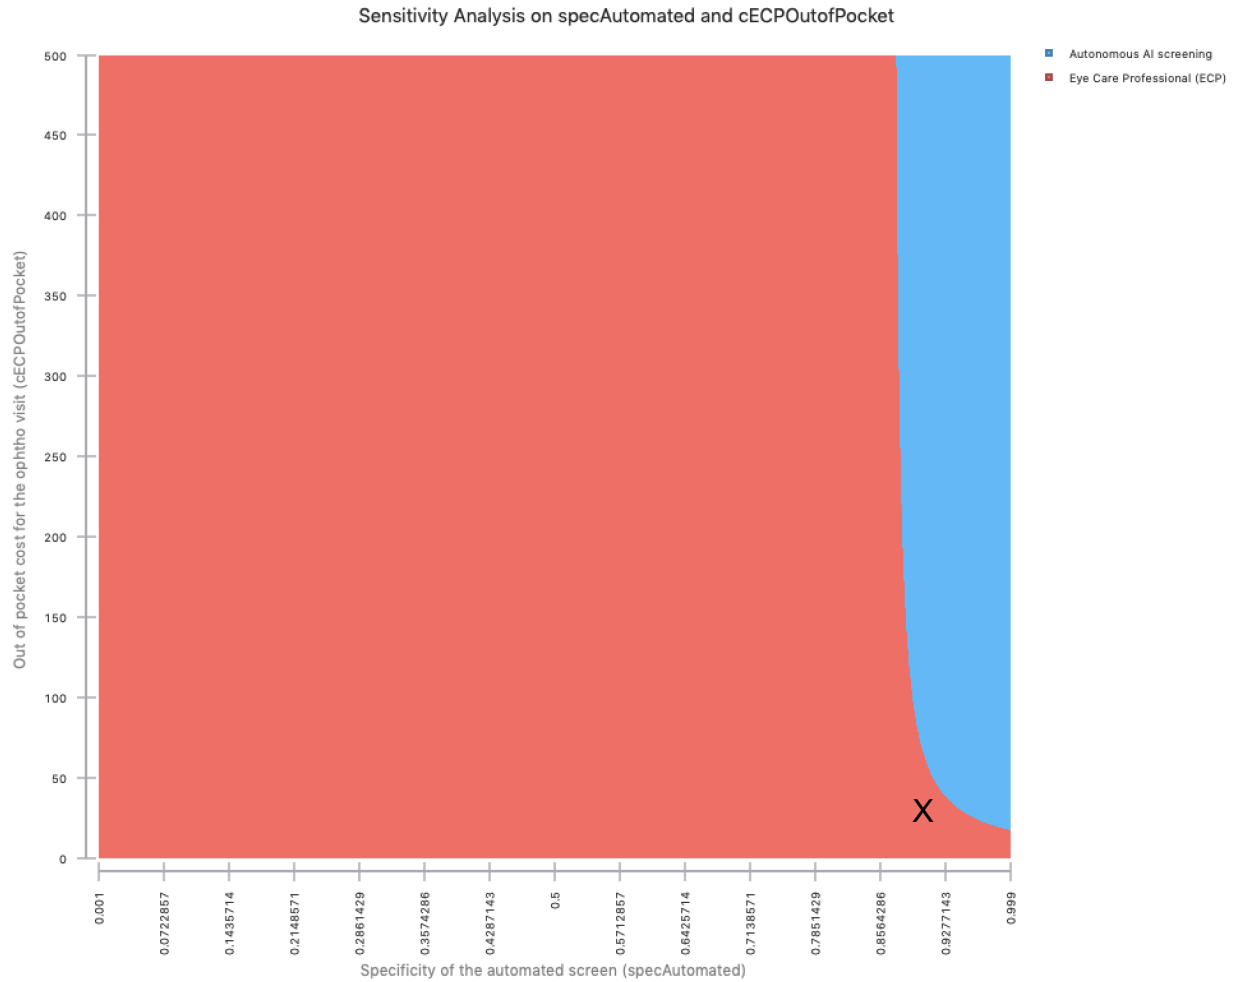

*Figure 26*  
 As the specificity of Aut goes up, the threshold on cECP goes down. But if spec Aut is less than .90 or so, ECP remains cheaper on average.

© 2020 American Medical Association. All rights reserved.

2-way analysis: DR prevalence vs pECPScreened

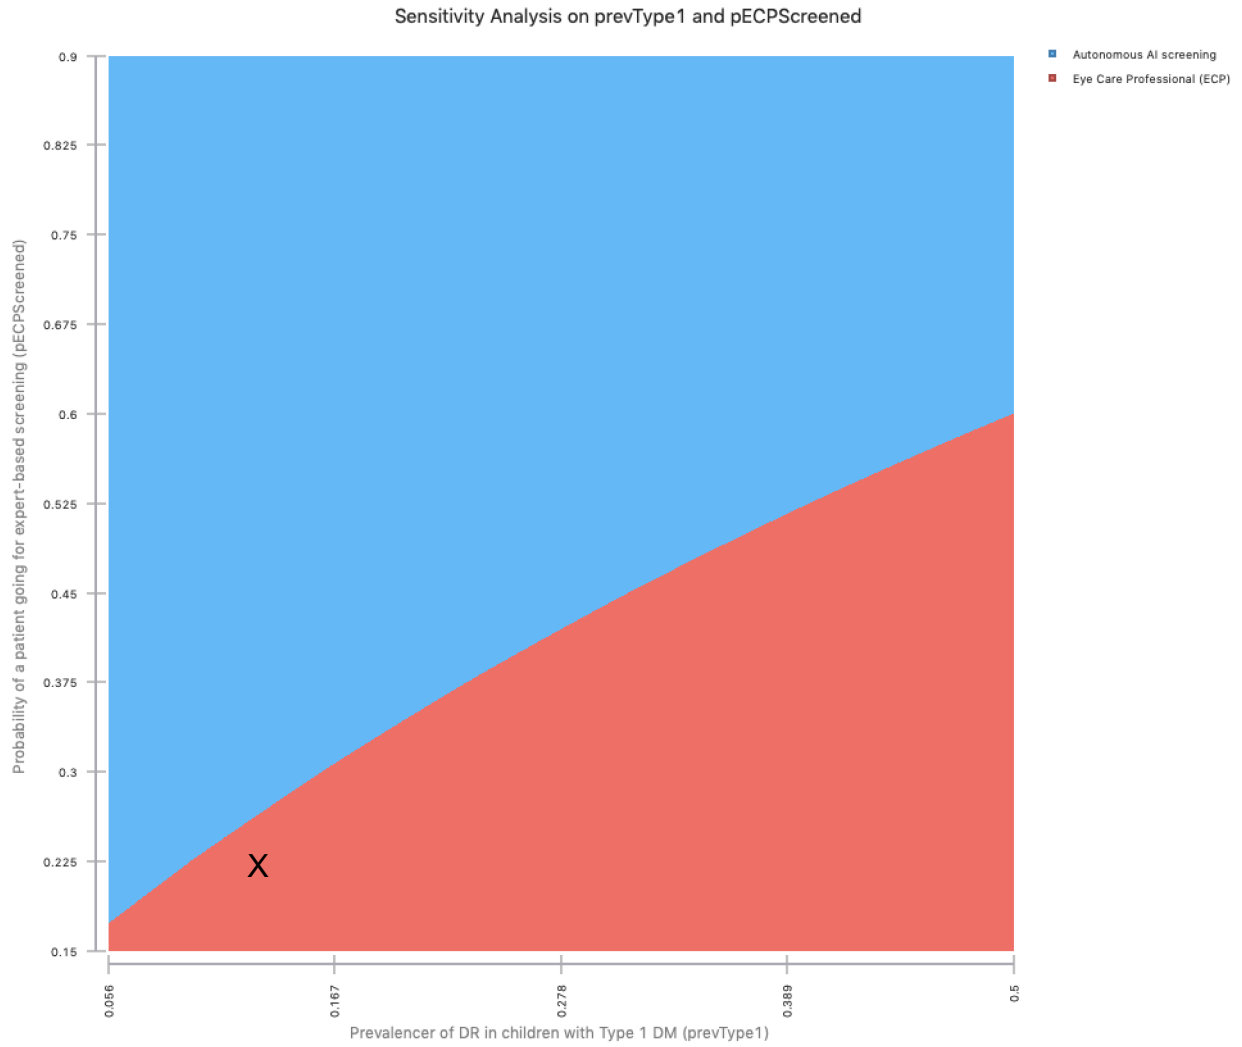

Figure 27

This sensitivity analysis confirms that, as the prevalence of DR goes up, the threshold for families keeping their ECP appointment at which Autonomous becomes cheaper on average also goes up.

© 2020 American Medical Association. All rights reserved.

2-way analysis: DR Prevalence vs cost of ECP

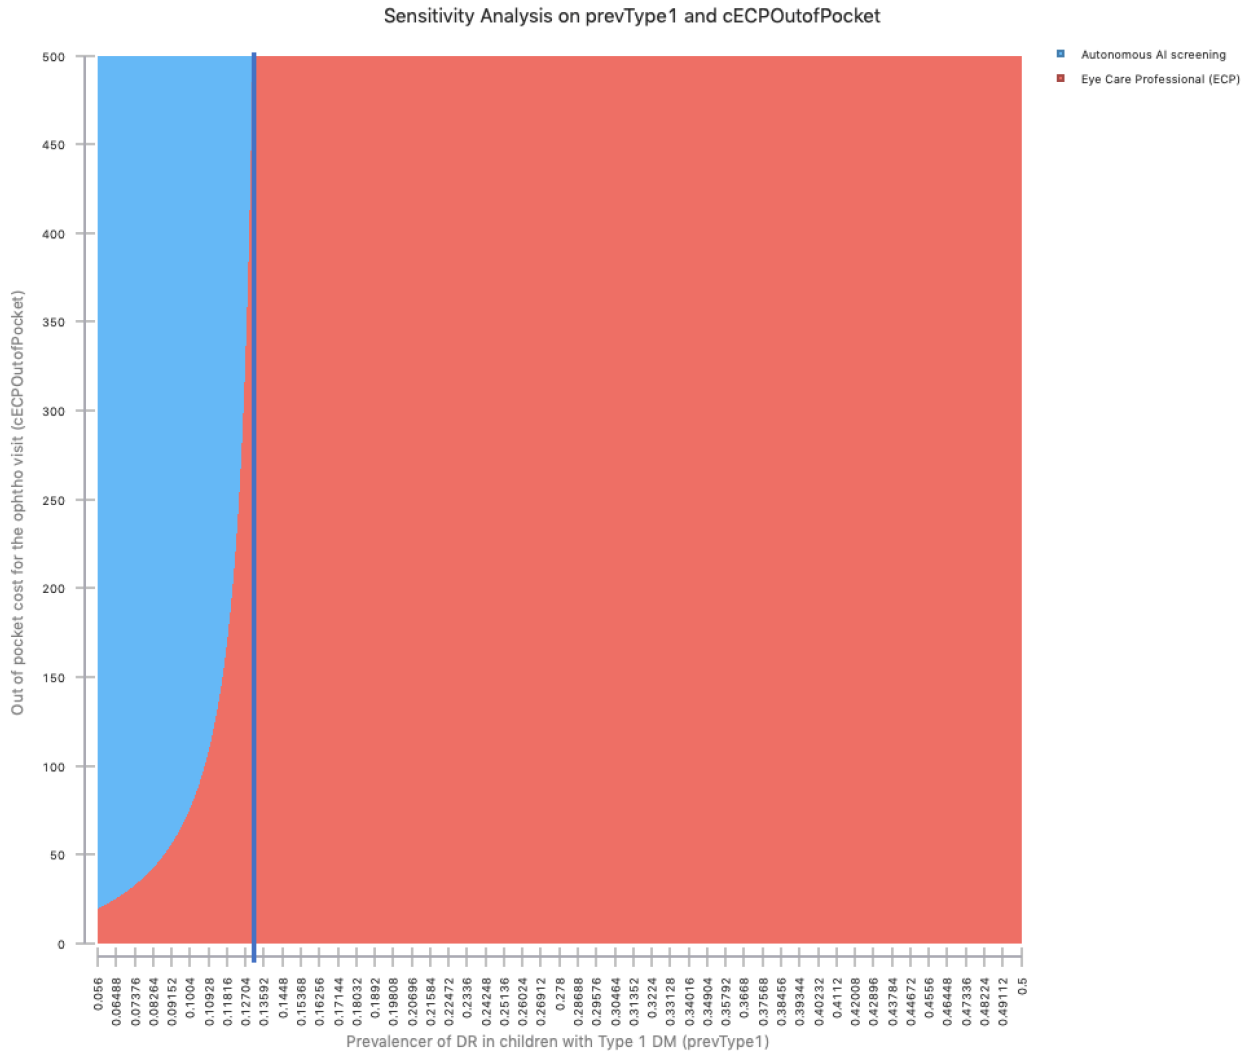

Figure 28  
 As the prevalence of DR prevalence rises, the threshold for cECP at which Autonomous becomes cheaper on average goes up as well, until a prevalence of about .13, at which point ECP remains cheaper on average for all cECPs.

### Cost-Effectiveness

| Type 1 | Auto   | ECP    |                        | Difference | Ratio |
|--------|--------|--------|------------------------|------------|-------|
| Cost   | \$8.52 | \$7.91 | $\Delta$ Cost          | \$0.61     | \$31  |
| TP     | .026   | .006   | $\Delta$ Effectiveness | 0.020      |       |



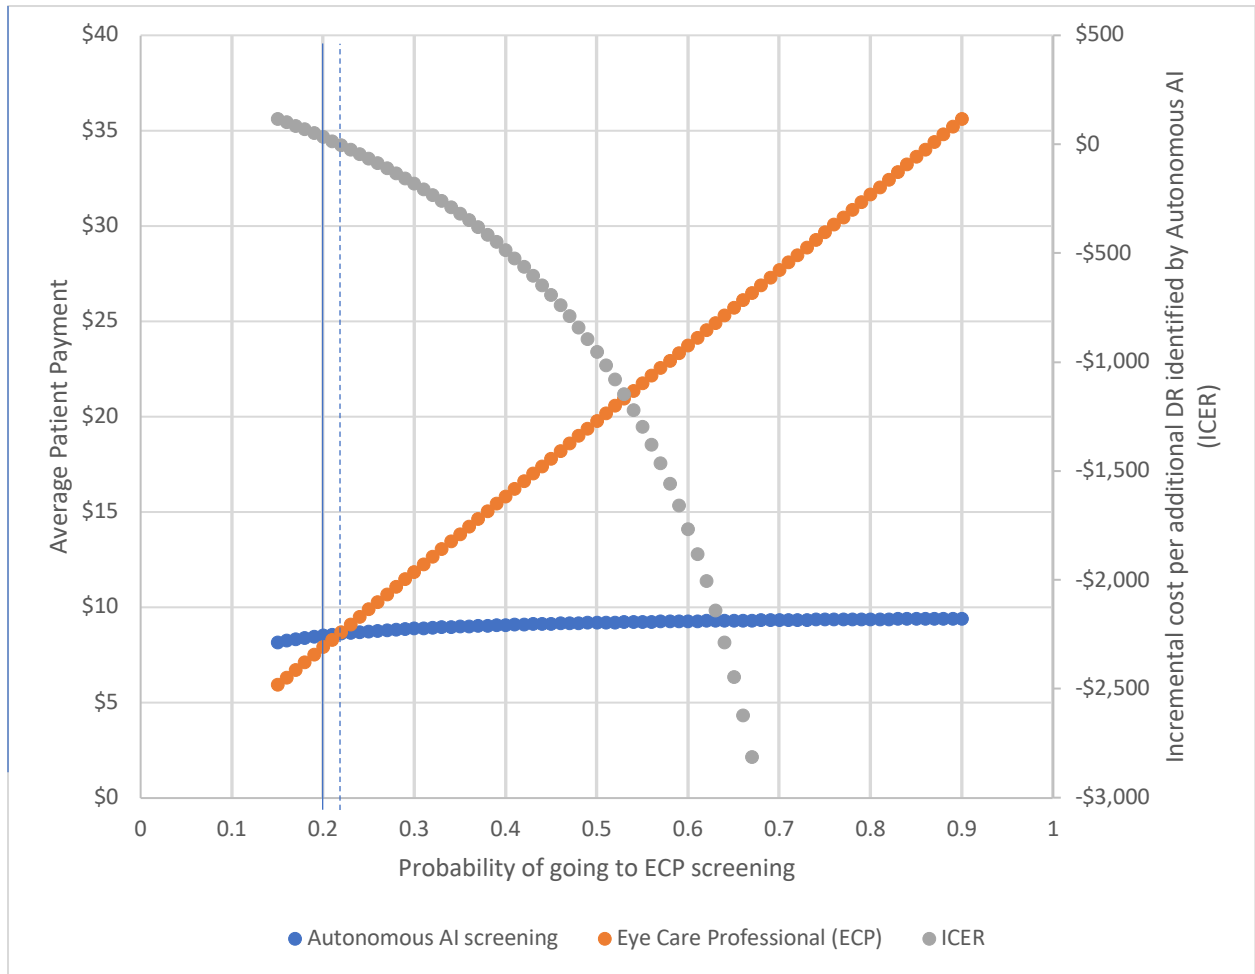

Figure 29

Vertical blue line at Probability of going to ECP screening of .20 represents the base-case value; the dashed vertical line at a probability of .225 represents the threshold.

ICER wrt DR prevalence

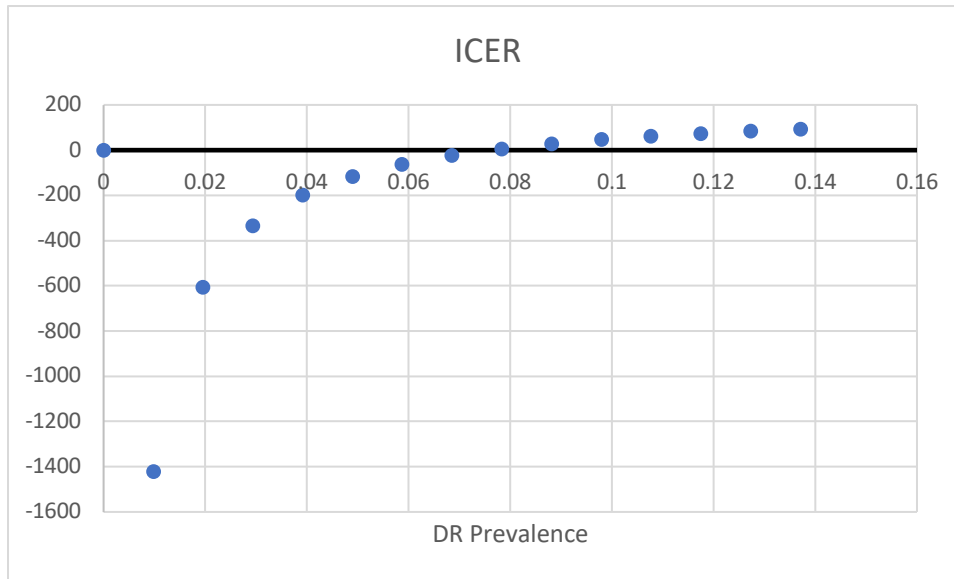

Figure 30

Autonomous becomes more incrementally more expensive on average at a prevalence of about .07, and rises from there.

## Type 2 DM

### Base Case Type 2 DM

PedsRetinaScreening.JAMAO.15June2020.Type2.png

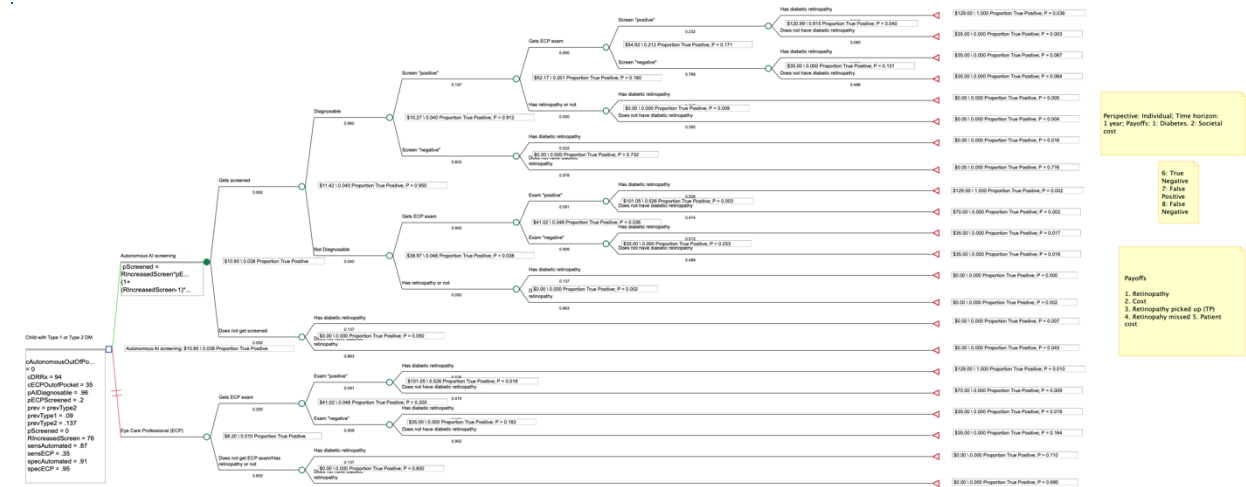

Figure 31

(Results summarized in Table 1)

## Tornado Diagram: Type 2 DM: True Positives

| Variable             | Type   | Low entry | High entry | Intervals | Low value | High value |
|----------------------|--------|-----------|------------|-----------|-----------|------------|
| pECPScreened         | Values | 0.15      | 0.9        | 10        | 0.15      | 0.9        |
| prev                 | Values | 0.09      | 0.5        | 14        | 0.09      | 0.5        |
| RIncreasedScreen     | Values | 0.5       | 100        | 4         | 0.5       | 100        |
| sensECP              | Values | 0.001     | 0.999      | 10        | 0.001     | 0.999      |
| specECP              | Values | 0.001     | 0.999      | 9         | 0.001     | 0.999      |
| sensAutomated        | Values | 0.001     | 0.999      | 15        | 0.001     | 0.999      |
| specAutomated        | Values | 0.001     | 0.999      | 14        | 0.001     | 0.999      |
| cECPOutofPocket      | Values | 0         | 500        | 10        | 0         | 500        |
| cAutonomousOutOfP... | Values | 0         | 100        | 10        | 0         | 100        |
| pAIDiagnosable       | Values | 0.8       | 0.99       | 4         | 0.8       | 0.99       |
| cDRRx                | Values | 0         | 10,000     | 4         | 0         | 10,000     |

Figure 32

# Tornado Diagram

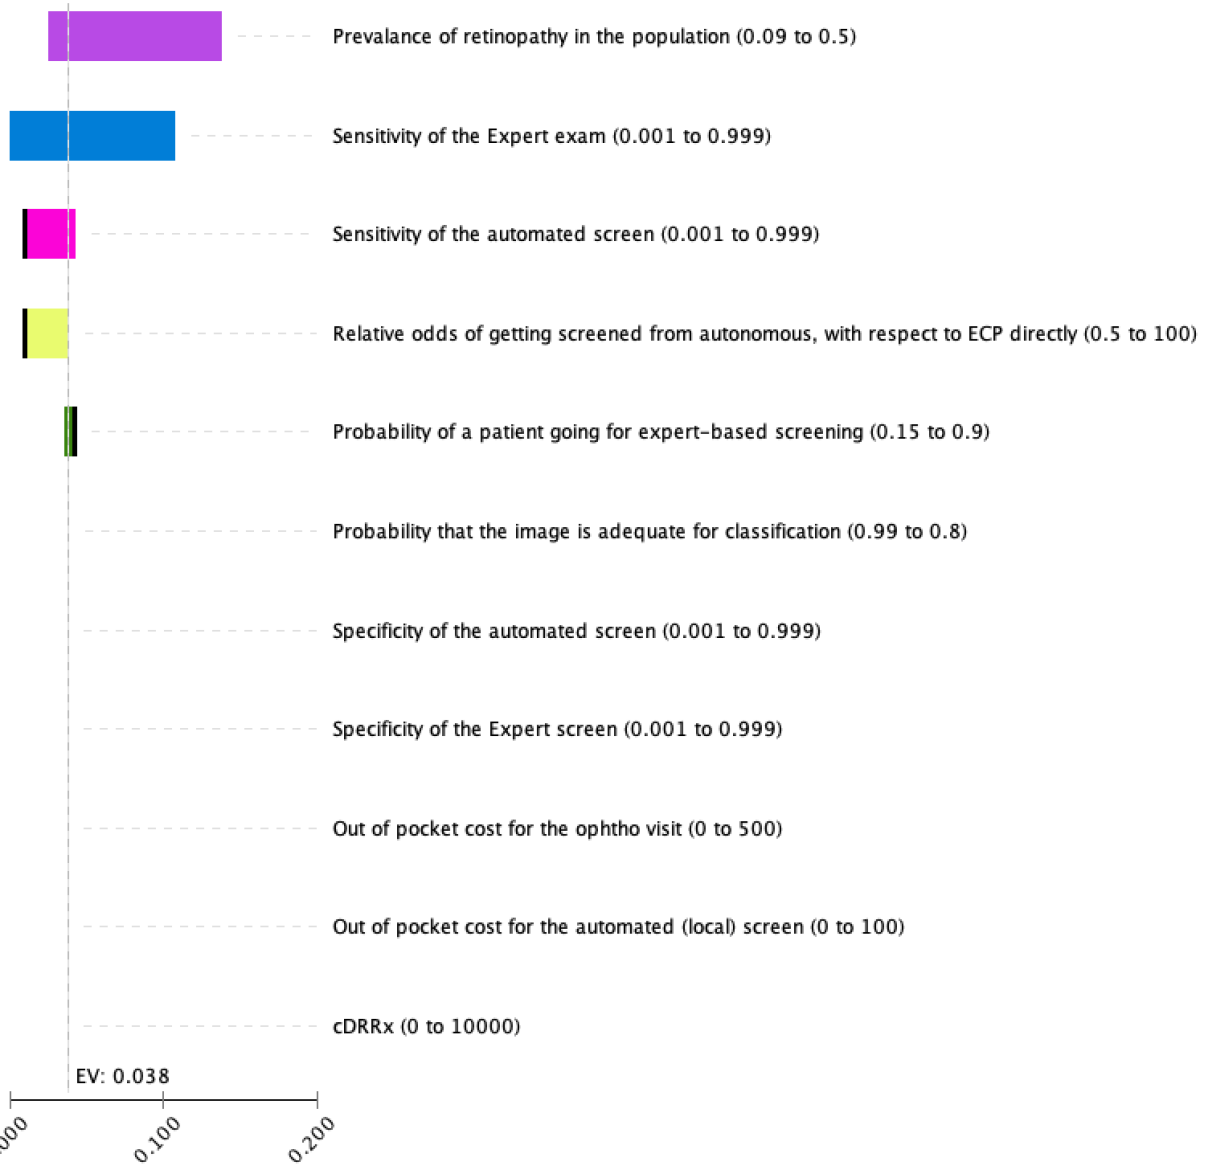

Figure 33

Sensitivity Analyses: Type 2 DM: True Positives DR Prevalence

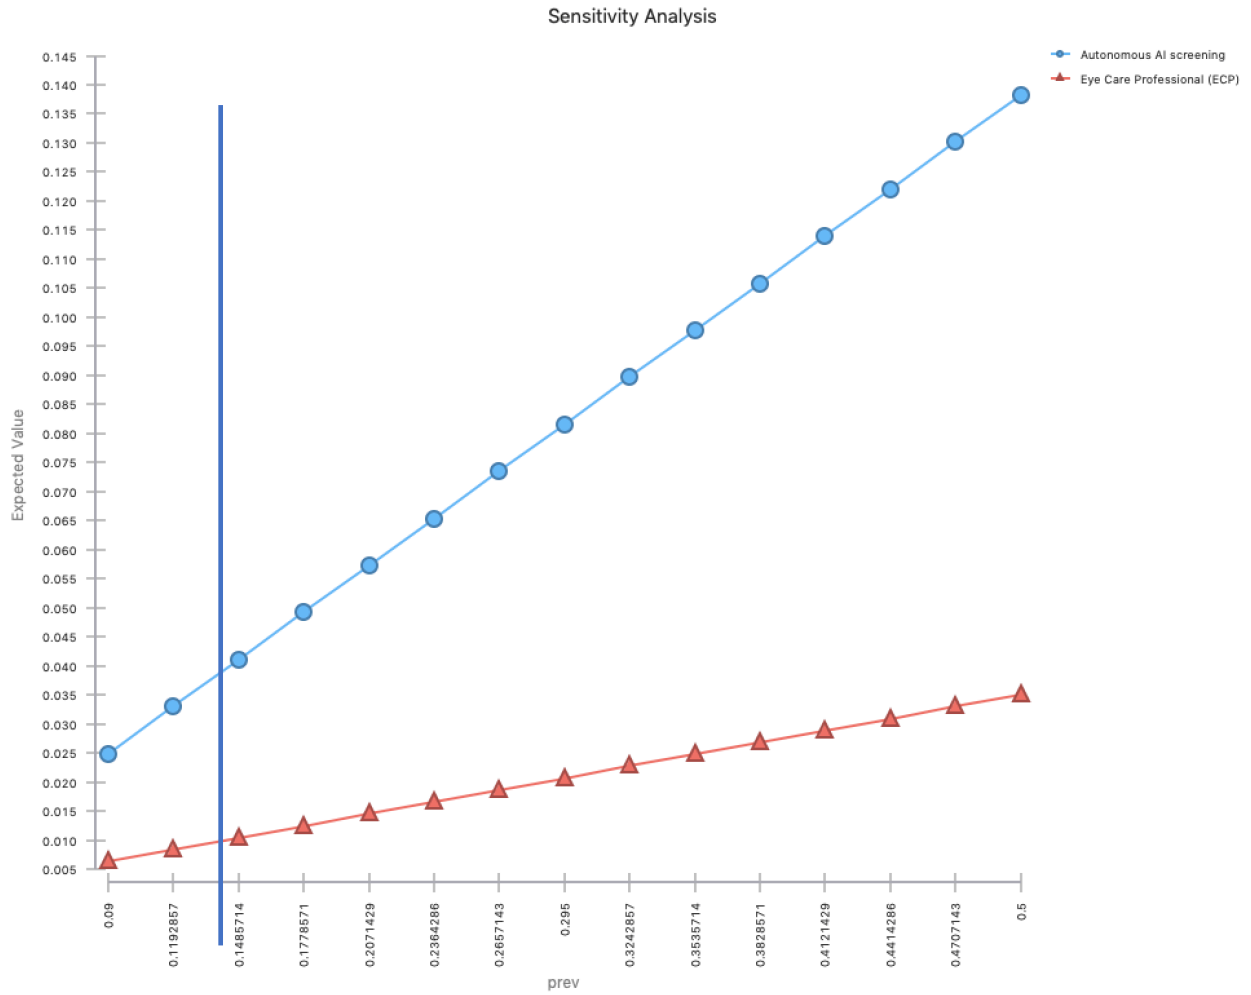

*Figure 34*  
 As in type 1, there is no threshold: the high sensitivity of Autonomous yields higher TPs than ECP.

© 2020 American Medical Association. All rights reserved.

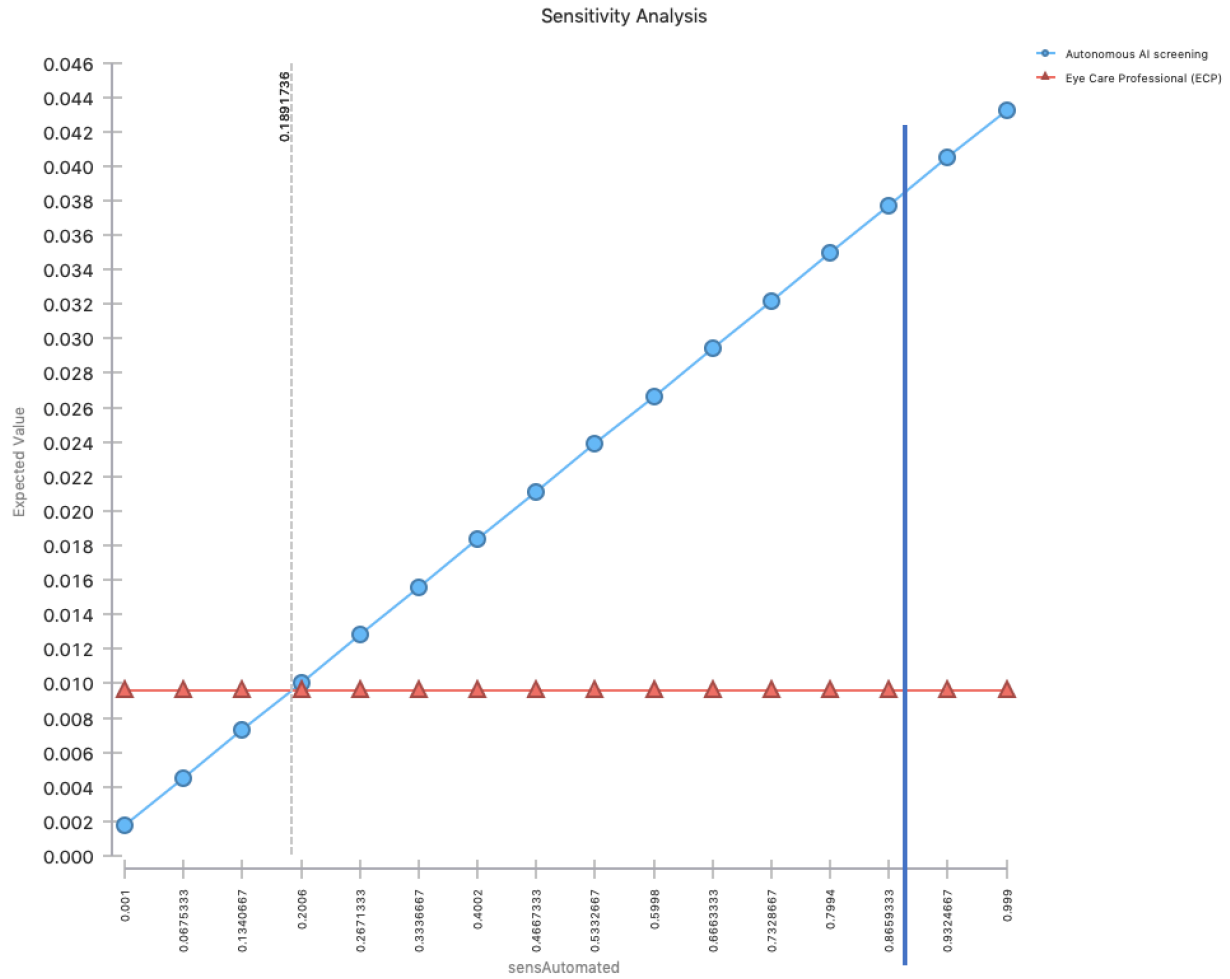

Figure 35

As in Type 1 DM, the threshold sensitivity (here, of .19) is much lower than the base case (.87), so doubt about the Autonomous system’s sensitivity does not change the conclusion of Autonomous’s higher TP detection.

## Probability of going to ECP

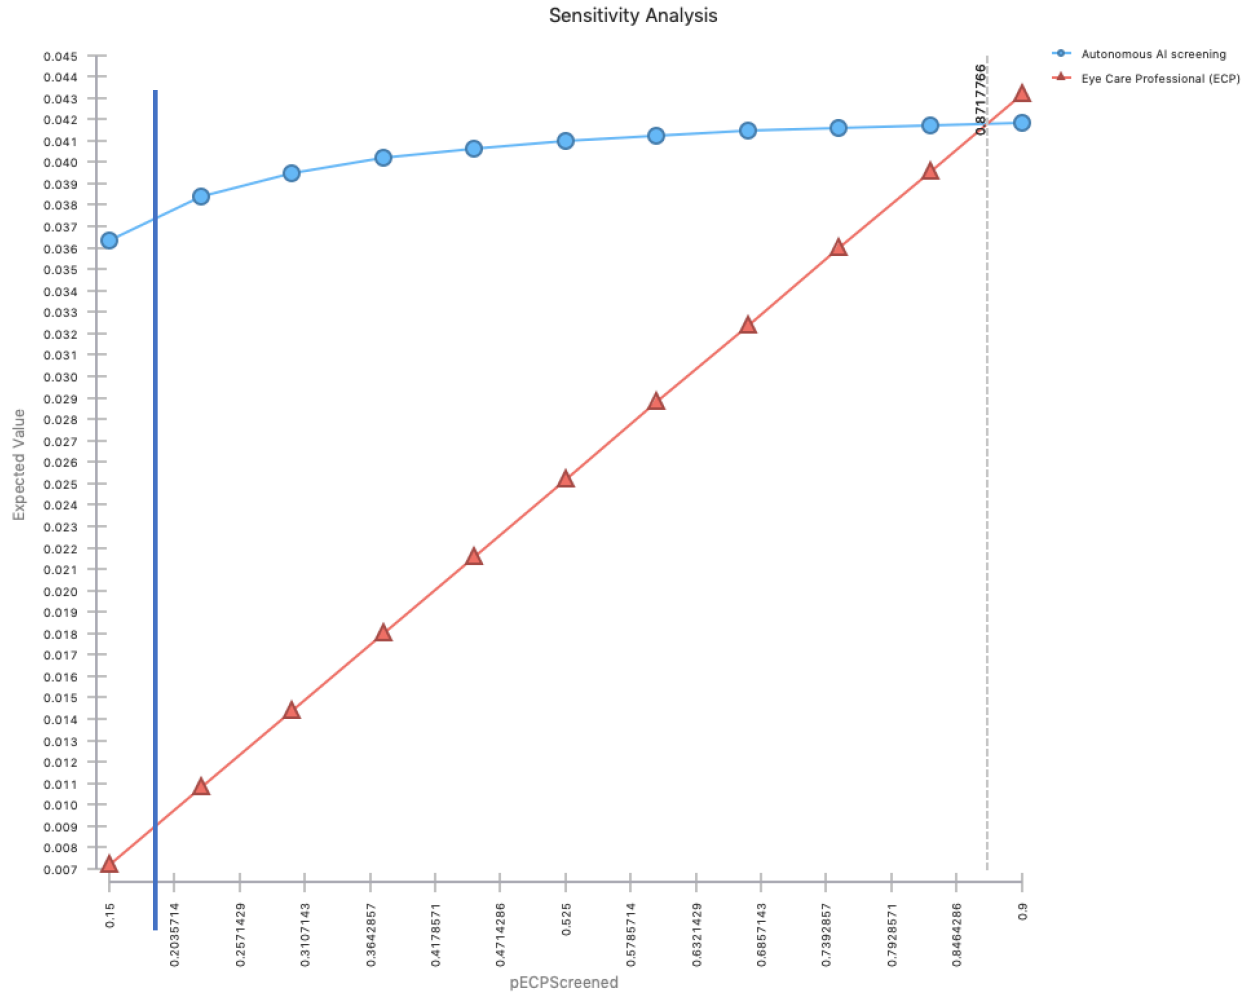

Figure 36

The threshold, where ECP detects more TPs than Autonomous, does not happen until a threshold of .87, much higher than the base rate of .20.

© 2020 American Medical Association. All rights reserved.

## Relative Odds of Keeping ECP Appointment

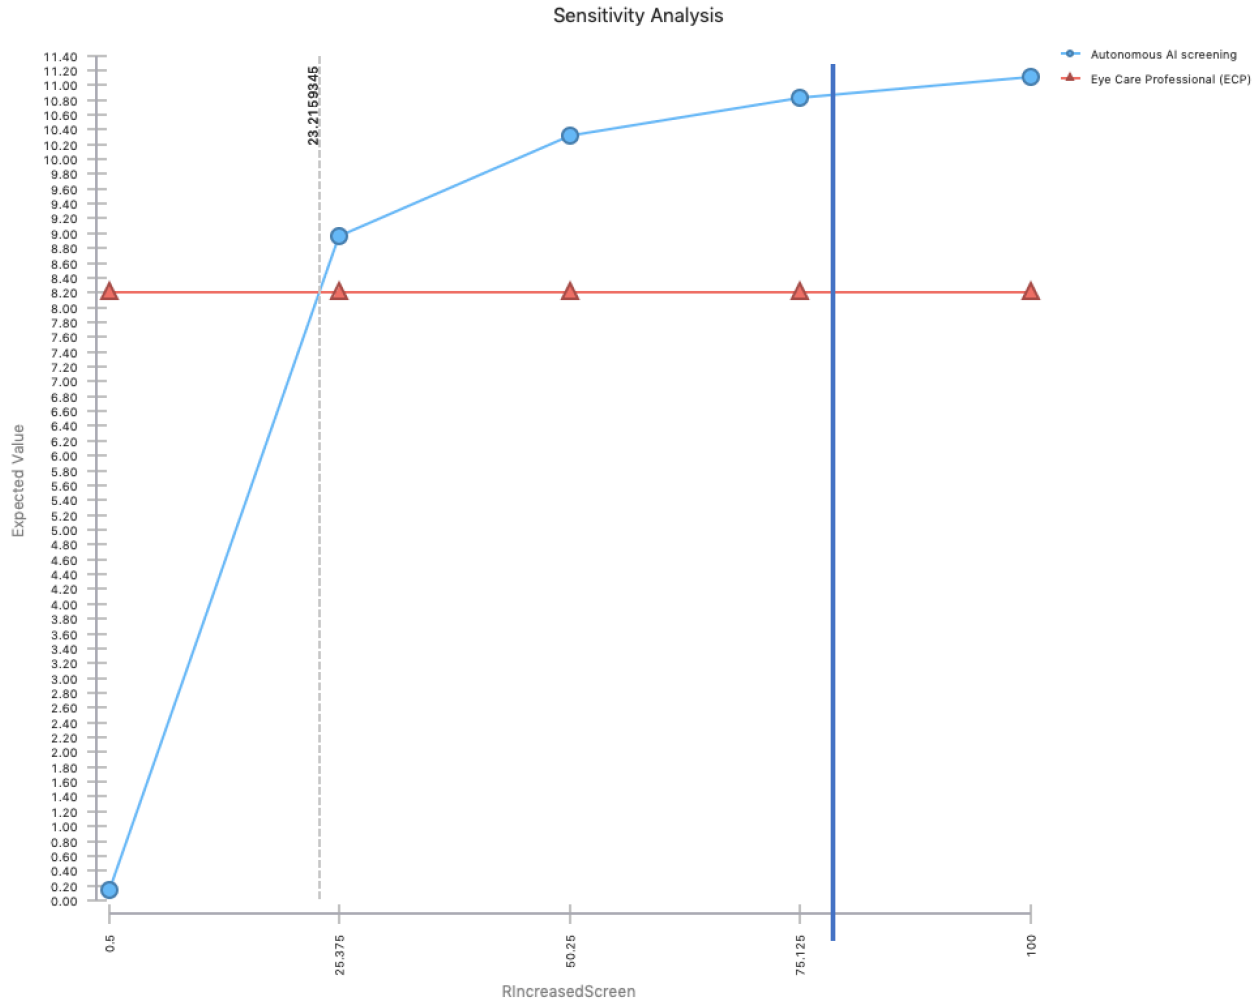

Figure 37

Still the same behavior as before. The threshold here is at a Relative odds of 26 (or probability, based on pECP of .20, of .88), a bit lower than in type 1.

Tornado Diagram: Type 2 DM: Out of Pocket Cost

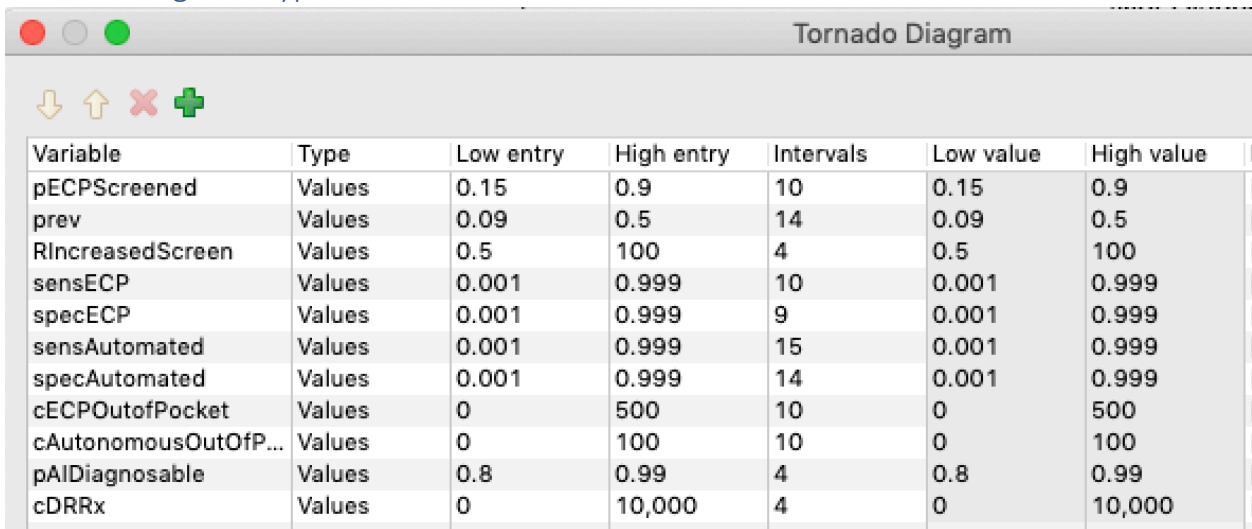

Figure 38



# Tornado Diagram

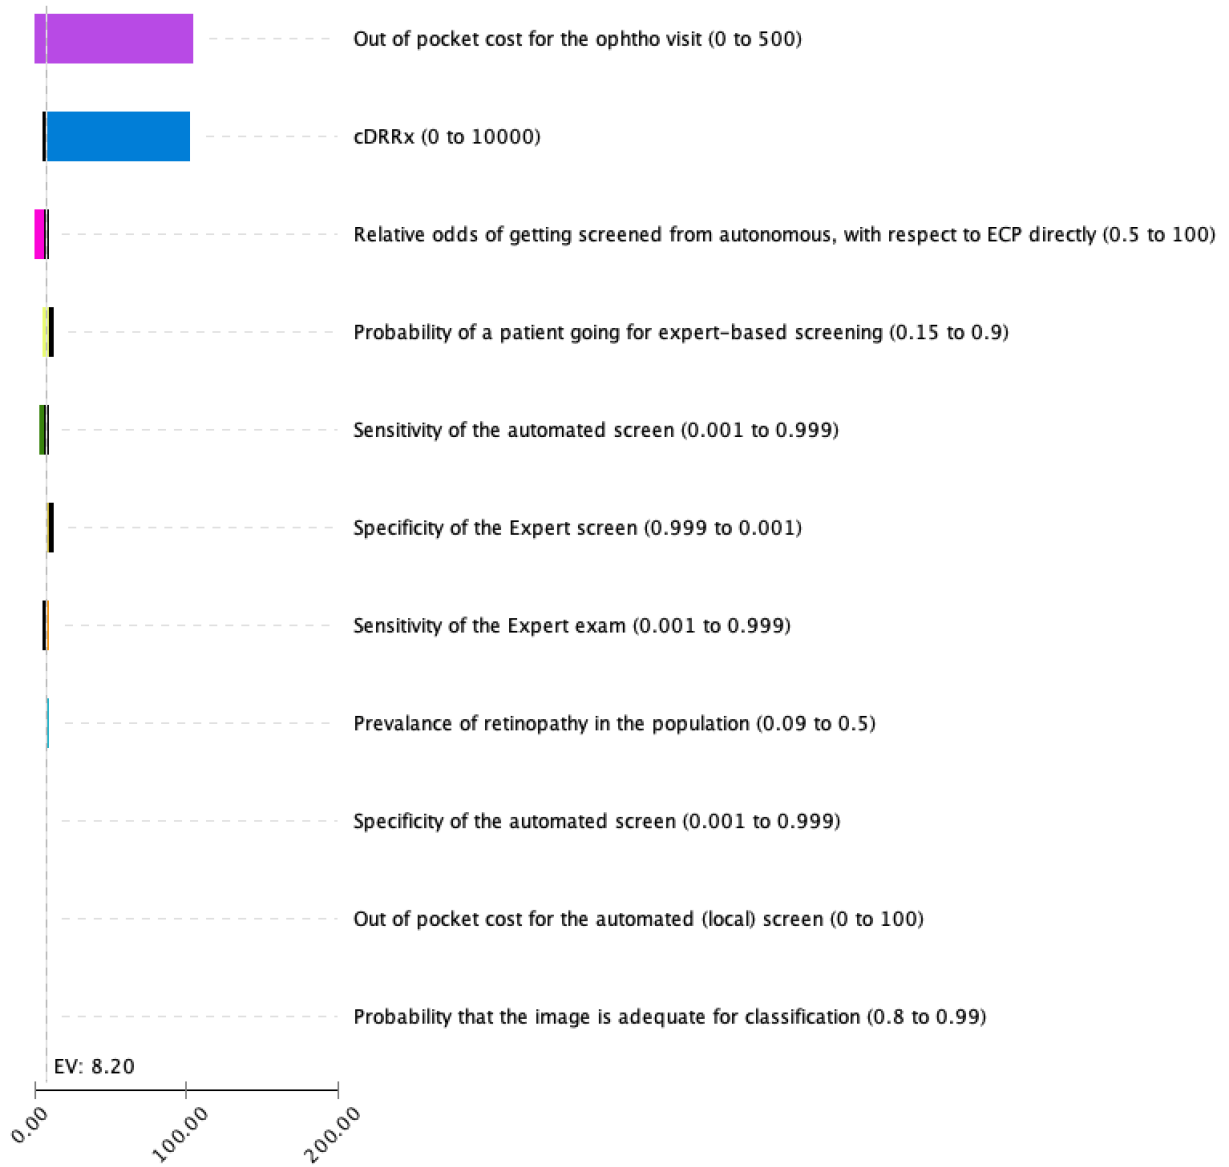

Figure 39  
Sensitivity Analysis Type 2 DM: Out of Pocket Costs  
Autonomous out of pocket cost

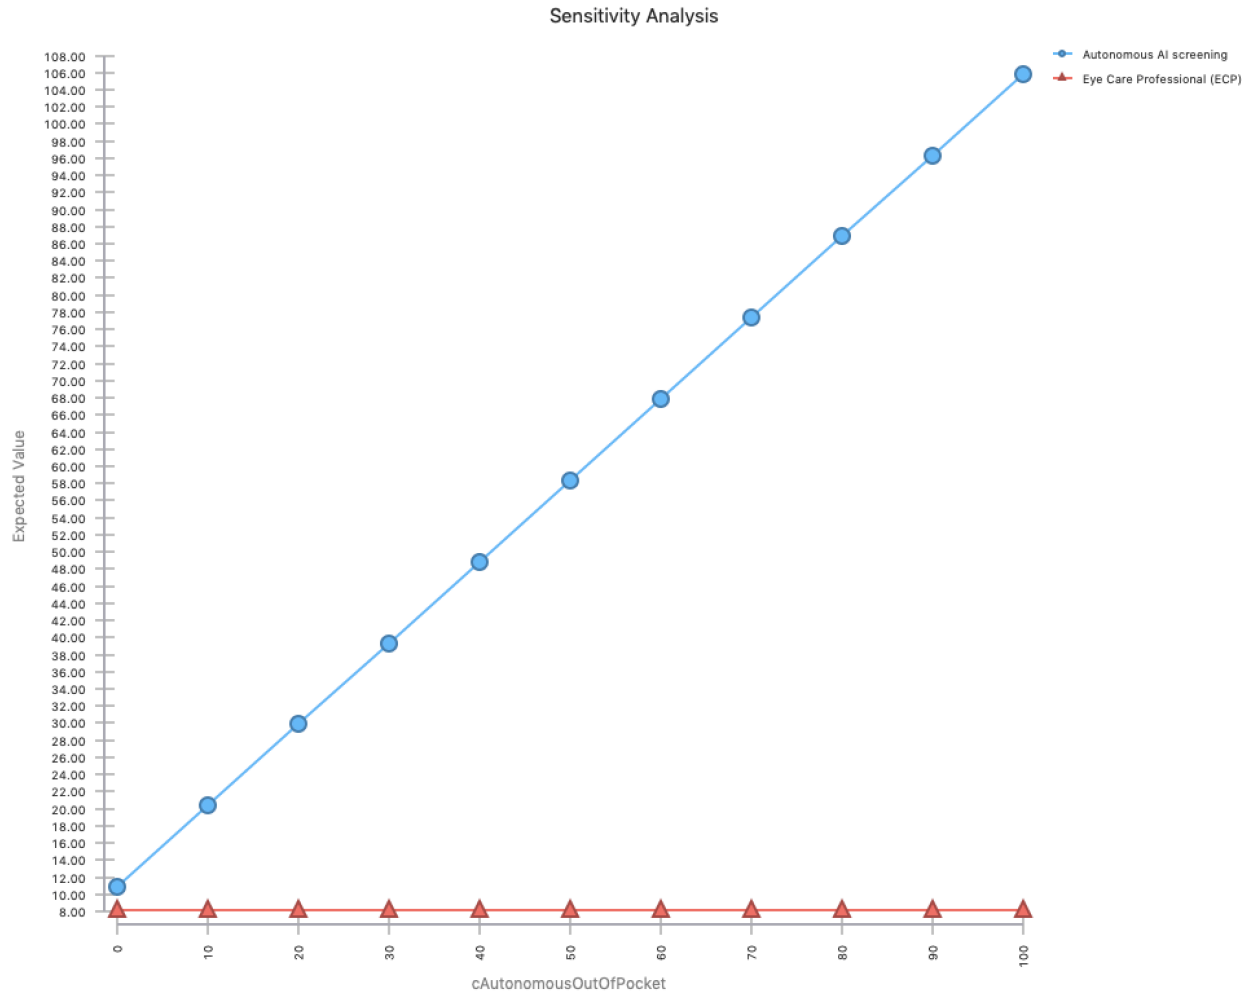

Figure 40

ECP strategy is unaffected by Autonomous out of pocket cost, and remains cheaper.

ECP out of pocket

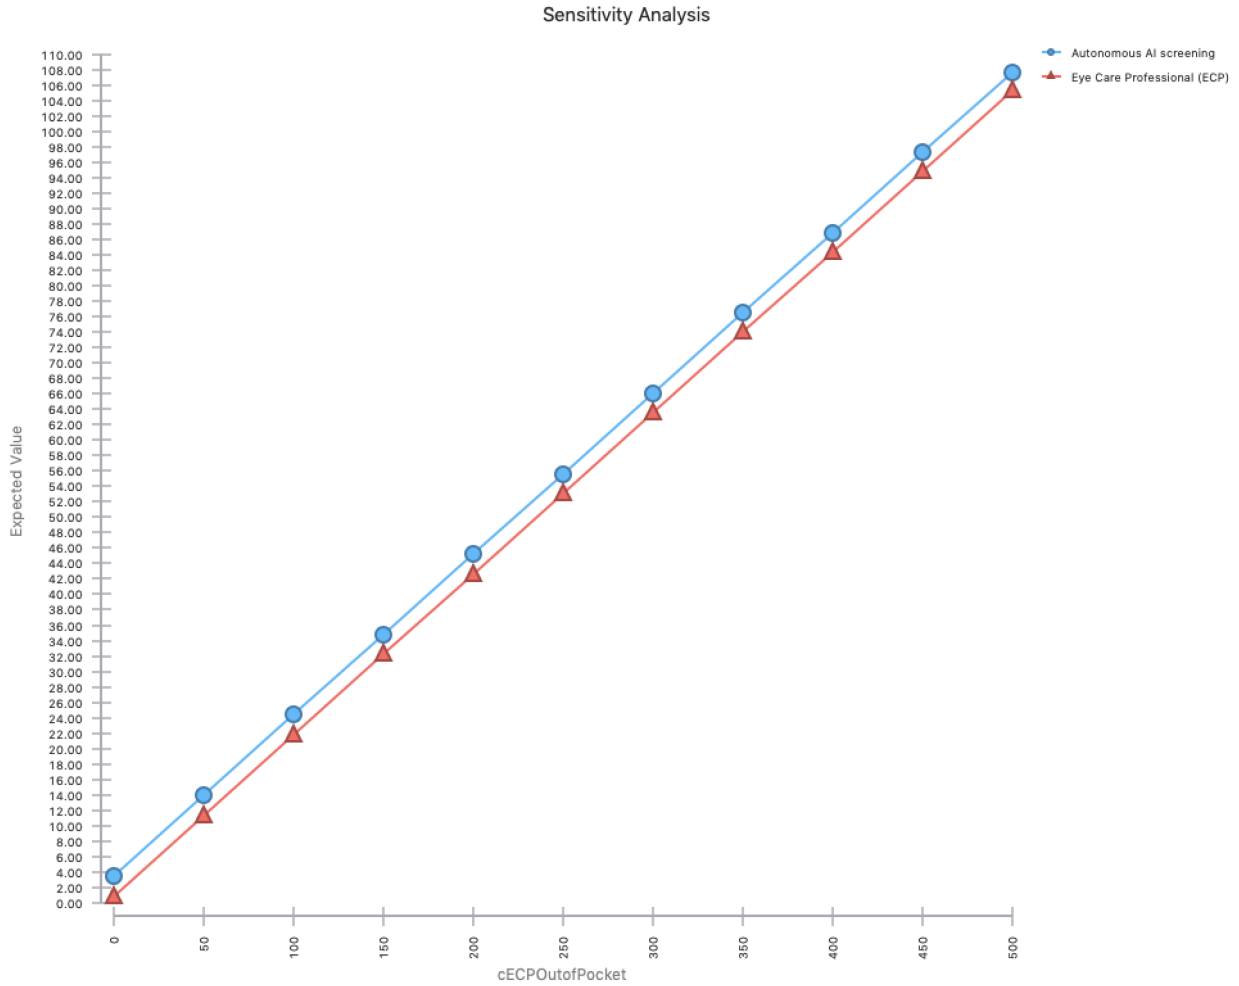

Figure 41

There is no threshold: Whatever the out of pocket cost is to ECP, the ECP strategy is always cheaper, on average, than Autonomous, because Autonomous leads to more ECP visits.

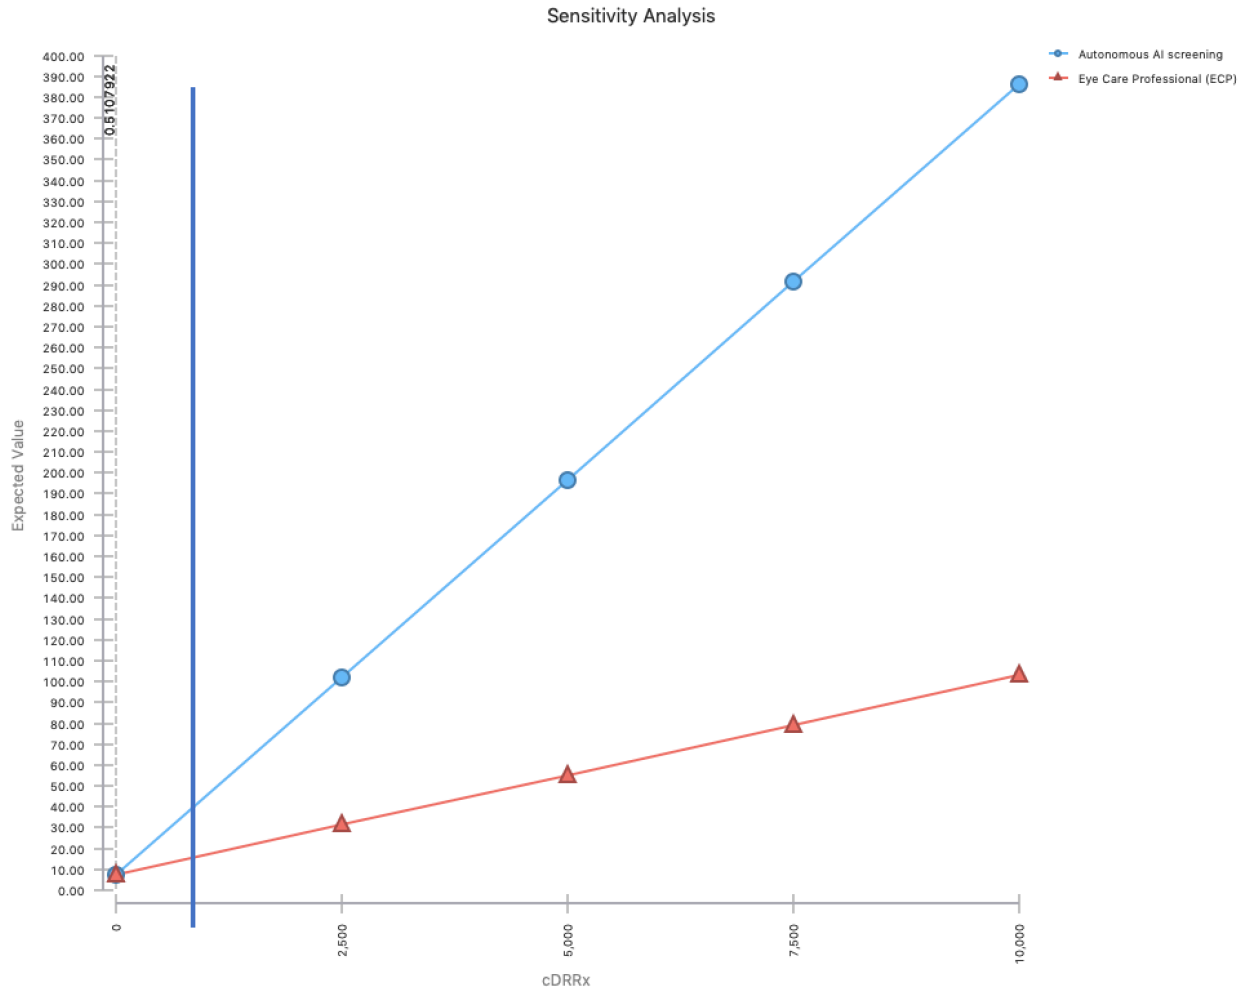

Figure 42

The threshold is at \$0, below the current base value of \$94. The maximum average out of pocket net cost, at a cDDRx of \$10,000, is \$390, compared with the \$260 for type 1 DM. This increase is because the prevalence in this sensitivity analysis is fixed at .137, higher than the .09 of the type 1 sensitivity analysis for cDDRx.

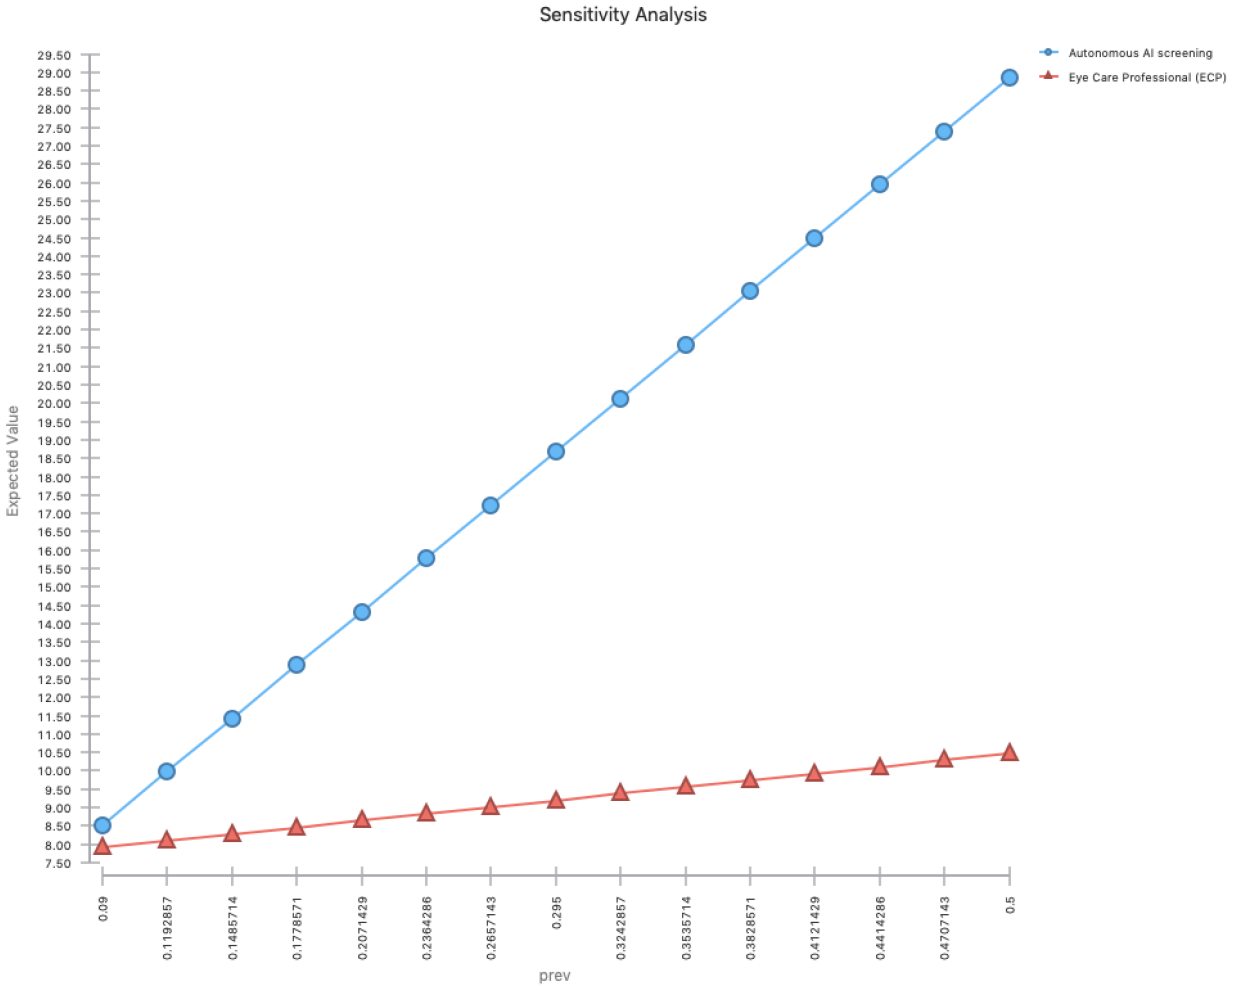

*Figure 43*  
 This is really the same curve as in type 1; there, the x-axis ranged from 0 to .137; here, from .09 to .50.

Sens Autonomous

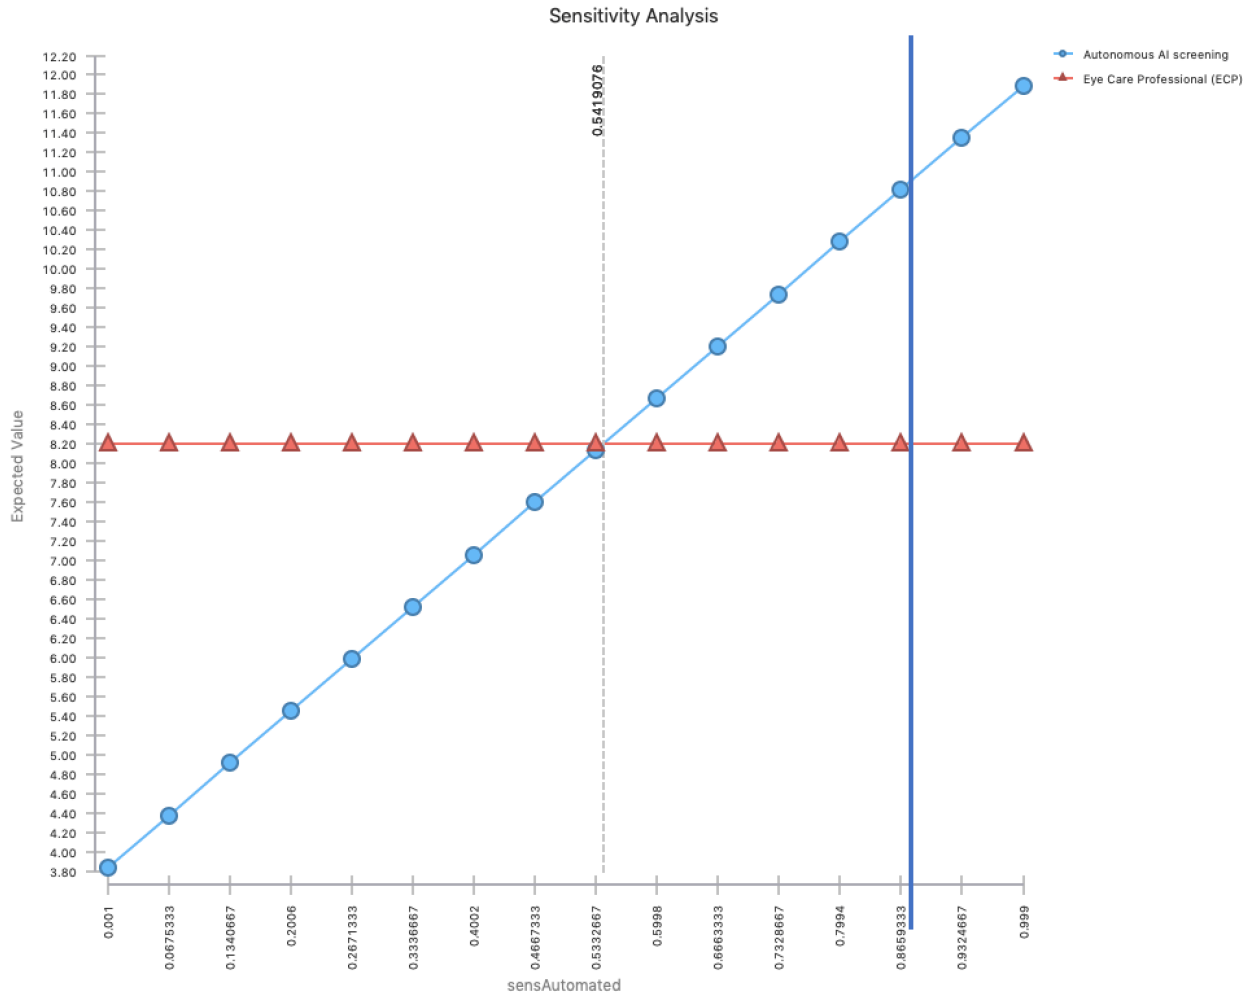

Figure 44

The threshold, of .53 (lower than the base value of .87) is lower here than in type 1 (threshold of .76), because the prevalence of DR is higher, leading to more referrals at lower sensitivities, leading to higher average cost for Autonomous.

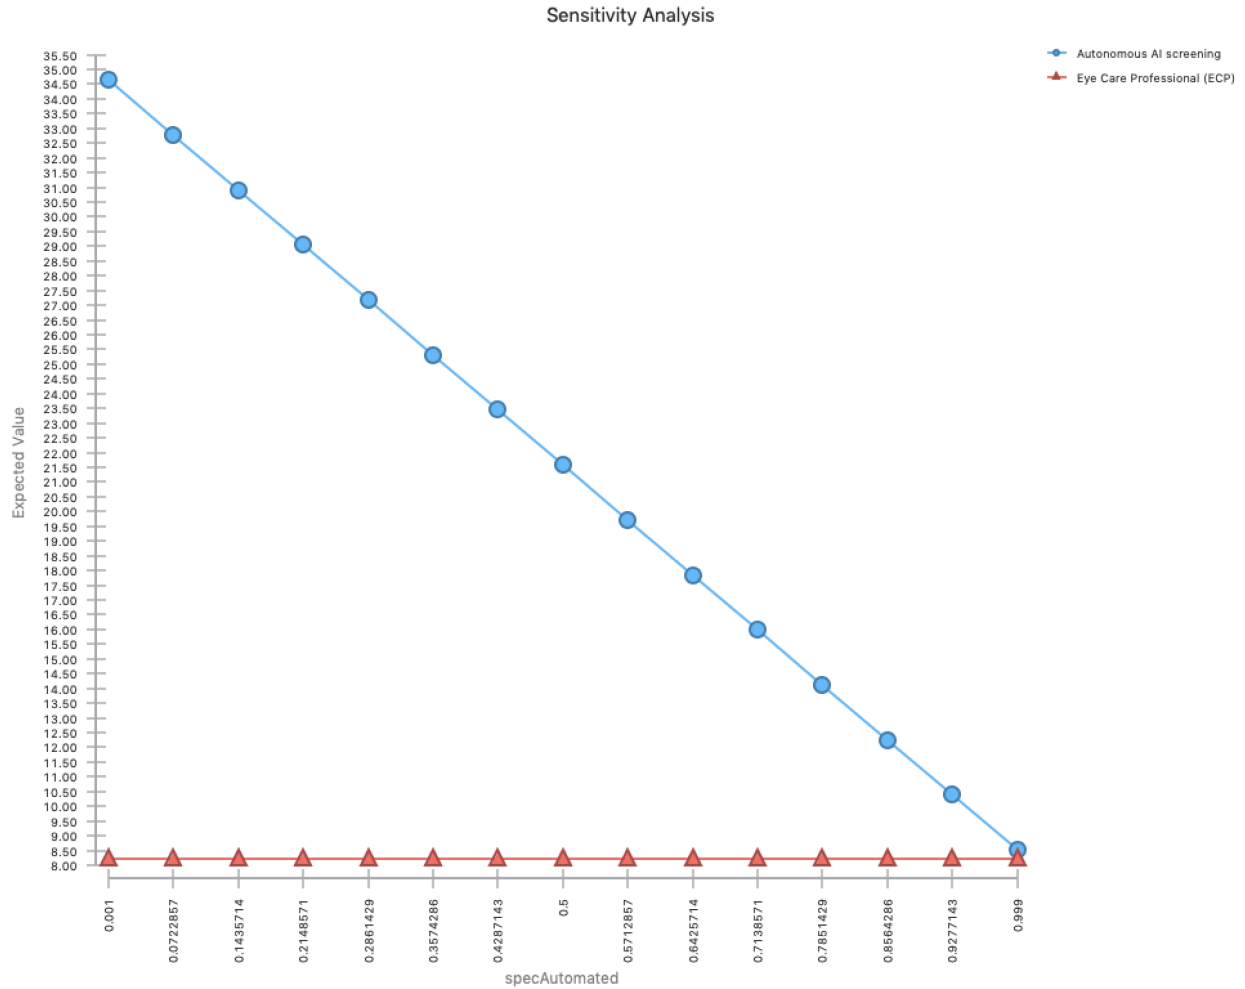

*Figure 45*  
 While the curves look similar to those in type 1, there is no threshold here (unlike type 1's threshold of .93). See 2-way sensitivity analysis, below.

© 2020 American Medical Association. All rights reserved.

Sensitivity ECP

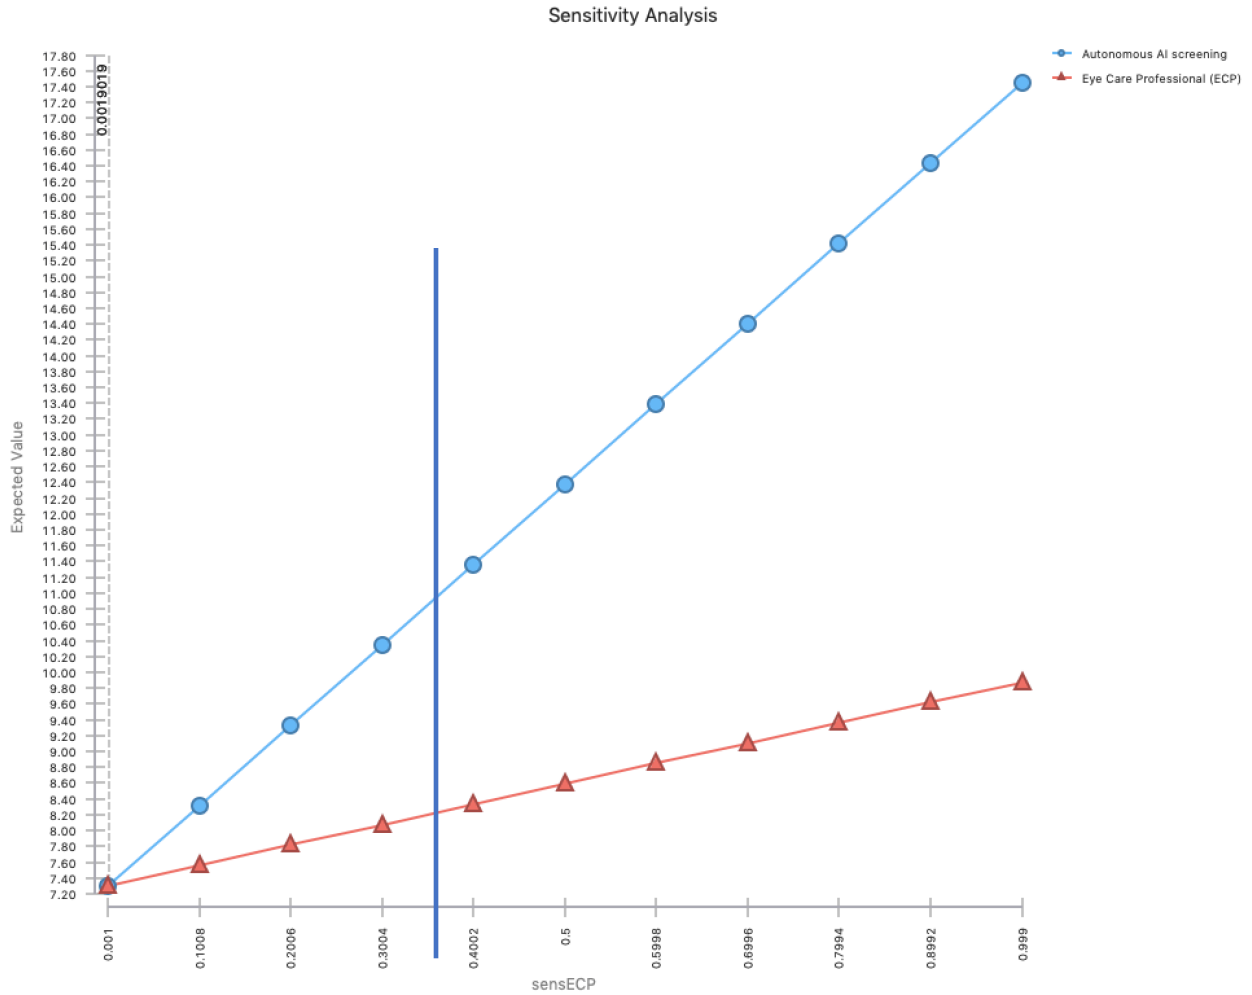

Figure 46  
 The difference between this graph (threshold of .001) and that in type 1 (threshold of .23) suggest an interaction between sensECP and prevalence of DR; see 2-way sensitivity below)

© 2020 American Medical Association. All rights reserved.



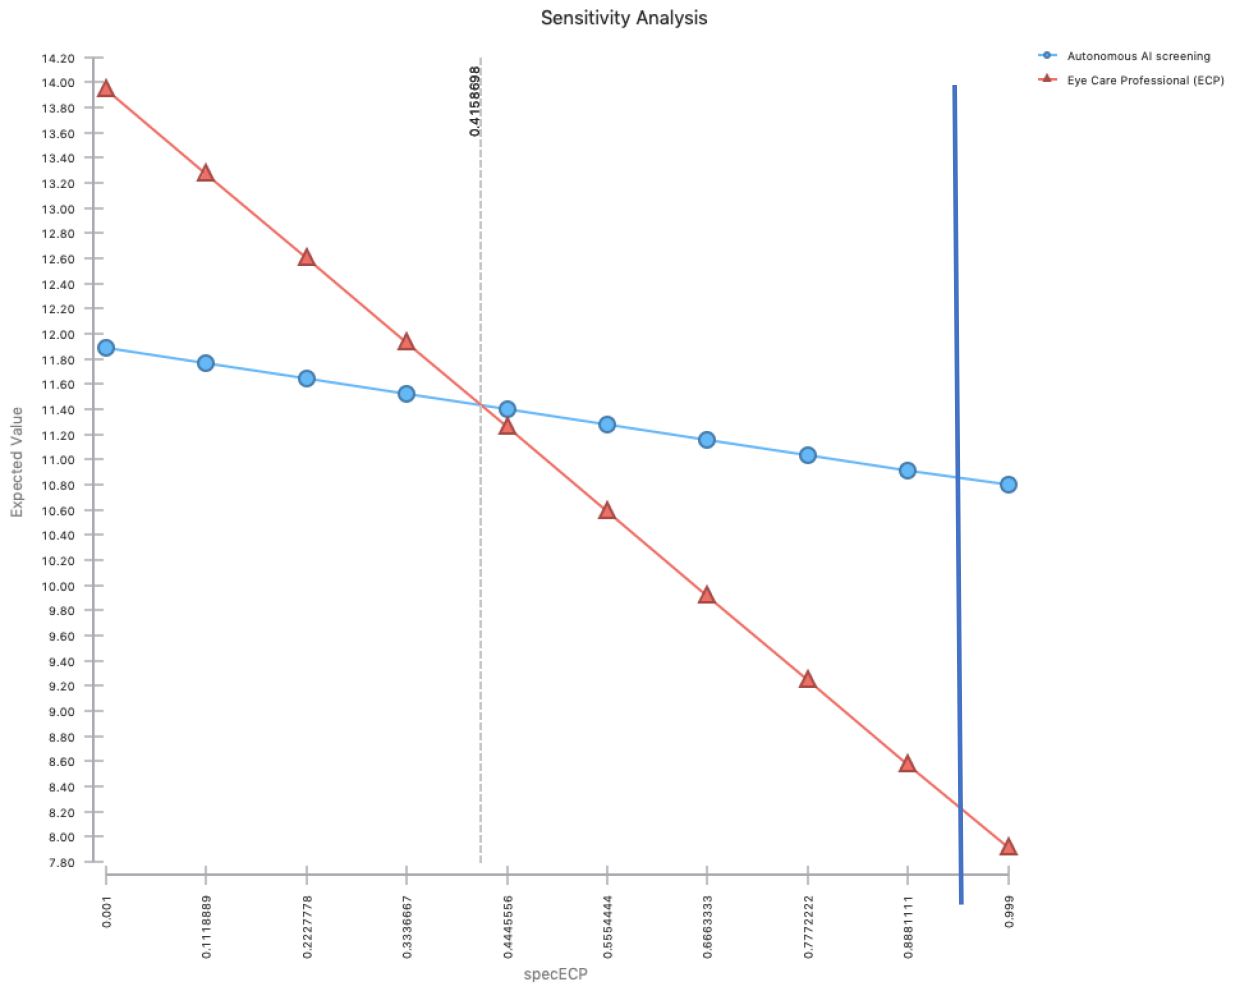

Figure 47

As in type 1 DM, as ECP specificity goes up, the false positive rate goes down, and so the overall average cost goes down. The threshold here is lower (.42, compared with .83) than in type 1, because the prevalence is higher, and the Autonomous line is less steep.

### Relative Odds of Keeping ECP Appointment



Figure 48  
 Still the same behavior as before. The threshold here is at a Relative odds of 26 (or probability, based on pECP of .20, of .88), a bit lower than in type 1.

2-way analysis: sensECP and prev

© 2020 American Medical Association. All rights reserved.

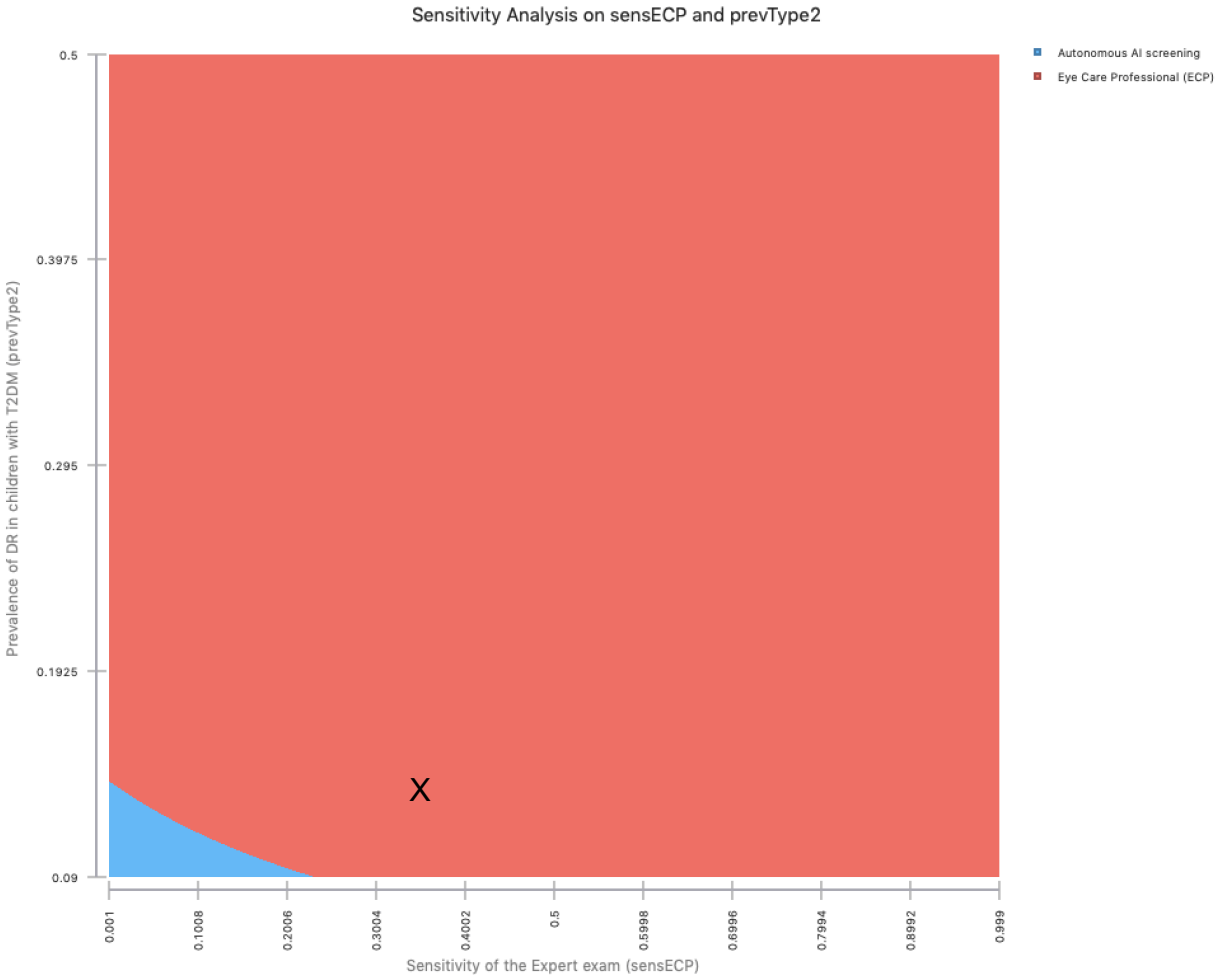

Figure 49

In the discussion above in the 1-way analysis of sens ECP for type 2 DM, it was hypothesized that the lower threshold in the case of a higher prevalence was due to an interaction. This interaction is shown there: the border between blue (Autonomous cheaper) and red (ECP) cheaper is the threshold for prevalence and sens ECP (depending on which you focus). The slope is negative: The higher the prevalence, the lower the threshold, which is what we saw above.

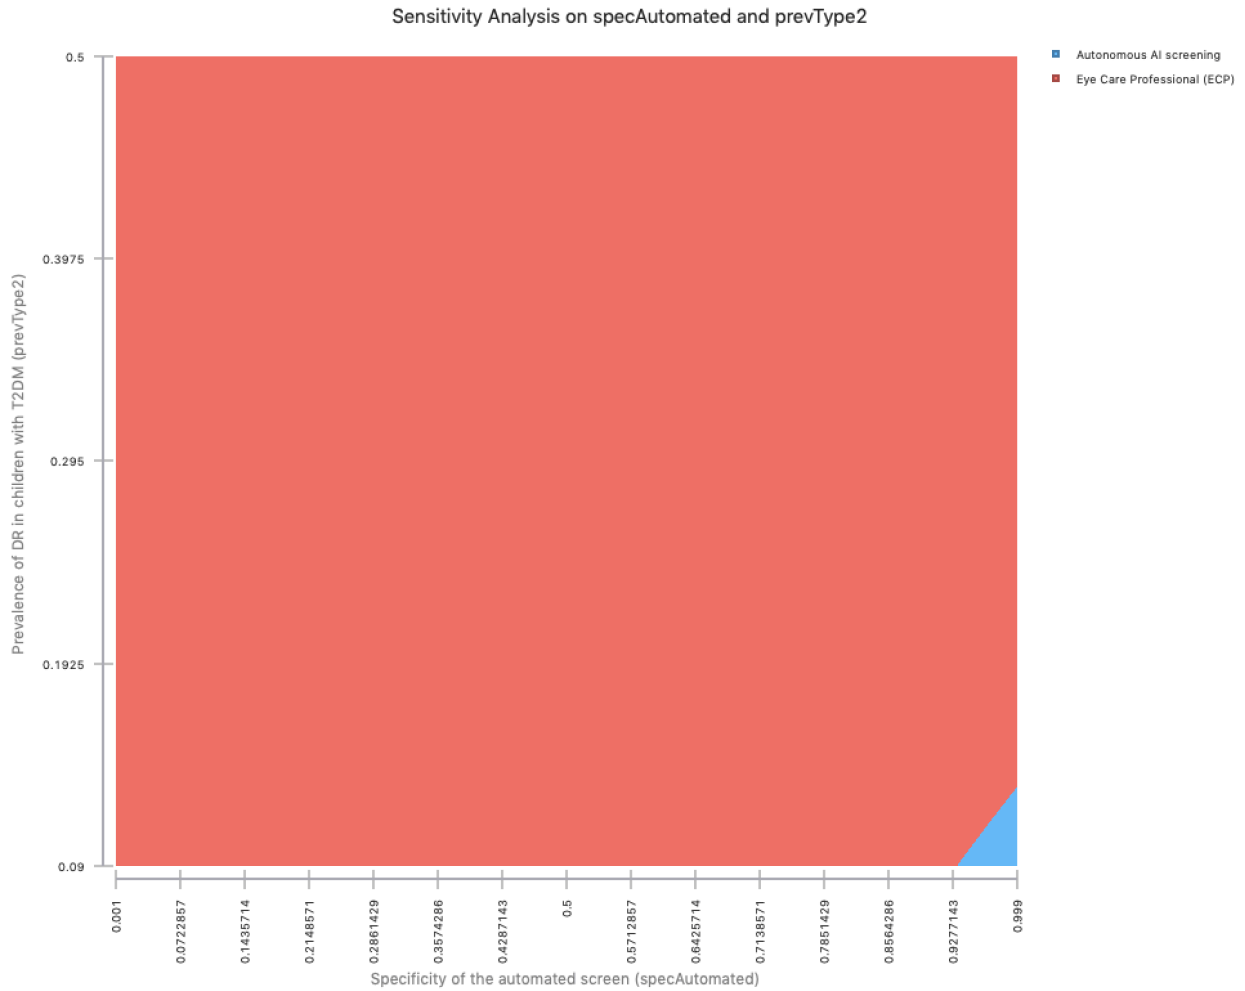

Figure 50

In the discussion of type 2 DM spec Aut 1-way sensitivity analysis above, it was noted that there was no threshold (or, it would be 1.0 or higher), while for type 1, there was a threshold at .93, suggesting that, the higher the prevalence, the higher the threshold. In this 2-way sensitivity analysis, the slope of the threshold border is positive, confirming that hypothesis.

### Cost-Effectiveness

| Type 2 | Auto    | ECP    |                        | Difference | Ratio |
|--------|---------|--------|------------------------|------------|-------|
| Cost   | \$10.85 | \$8.20 | $\Delta$ Cost          | \$2.65     | \$95  |
| TP     | .038    | .010   | $\Delta$ Effectiveness | 0.028      |       |
